# Supplementary material
Source: Copernicus journal article supplement (doi:10.5194/hess-30-2337-2026)
Supplement: Supplementary file 1 [file hess-30-2337-2026-supplement.pdf]

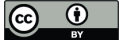

*Supplement of*

**Technical note: High Nash–Sutcliffe Efficiencies conceal poor simulations of interannual variance in seasonal regimes**

**Sacha W. Ruzzante et al.**

*Correspondence to:* Sacha W. Ruzzante (sruzzante@uvic.ca)

The copyright of individual parts of the supplement might differ from the article licence.

## Contents

|                                                                                                     |    |
|-----------------------------------------------------------------------------------------------------|----|
| S1: Benchmark KGEs.....                                                                             | 2  |
| S2: Relationship between benchmark NSE and climate indices.....                                     | 5  |
| S3: Time Series decomposition .....                                                                 | 8  |
| S4: The overall NSE is the weighted mean of the component NSEs .....                                | 12 |
| S5: Model Details .....                                                                             | 14 |
| S6: Comparing Goodness-of-fit statistics for models based on different thresholds and indices ..... | 17 |
| S7: Long Short-Term Memory model for Brazil.....                                                    | 25 |
| S8: Variance Components .....                                                                       | 28 |
| S6.1: Examples of interannually variable streams .....                                              | 29 |
| S6.2: Examples of highly irregular streams .....                                                    | 32 |
| S6.3: Examples of highly seasonal streams .....                                                     | 35 |
| S9: Climatological $NSE_{cb}$ based on differential split samples.....                              | 39 |
| References .....                                                                                    | 41 |

## S1: Benchmark KGEs

For the climatological benchmark model, the NSE and KGE are closely related. Figure S1 shows the benchmark KGEs for the 20,338 catchments.

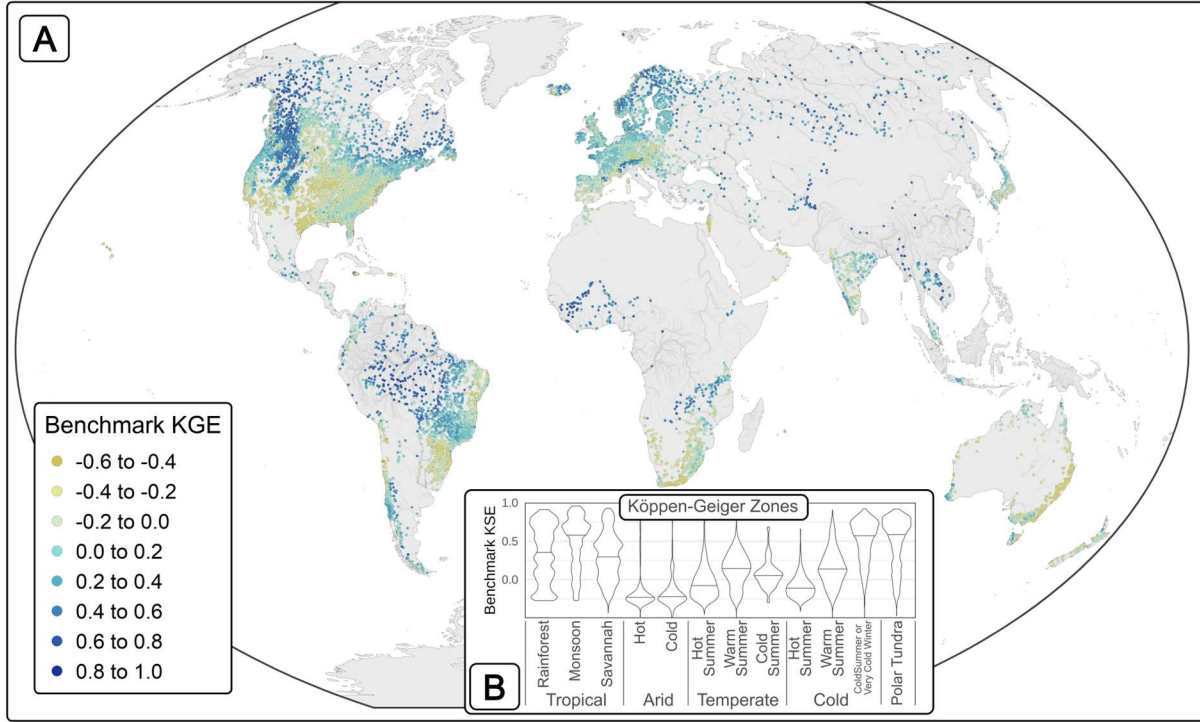

Figure S1: A: Climatological Benchmark KGEs for 20,338 catchments. B: Benchmark KGEs by Köppen-Geiger climate classification.

For a climatological benchmark model, where the model is calculated and tested on the same data, the KGE is uniquely and monotonically defined by the NSE. The NSE can be written as:

$$NSE = 2r\alpha - \alpha^2 - \beta^2 \quad [S1]$$

Where  $r$  is the Pearson correlation coefficient,  $\alpha$  is the ratio of standard deviations  $\sigma$  in the simulated (s) and observed (o) time series, and  $\beta$  is the bias.

$$\alpha = \frac{\sigma_s}{\sigma_o} \quad [S2]$$

$$\beta_n = \frac{\mu_s - \mu_o}{\sigma_o} \quad [S3]$$

Since the climatological model is generated by averaging the observed time series,  $\beta_n = 0$  for the benchmark  $NSE_{cb}$ .

$$NSE_{cb} = 2r\alpha - \alpha^2 \quad [S4]$$

The KGE is defined as:

$$KGE = 1 - \sqrt{(r-1)^2 + (\alpha-1)^2 + (\beta-1)^2} \quad [S5]$$

Where  $\alpha$  is as defined above and:

$$\beta = \frac{\mu_s}{\mu_o} \quad [S6]$$

Again the bias term  $\beta - 1 = 0$ . We can therefore expand and rearrange the  $KGE_{cb}$ :

$$KGE_{cb} = 1 - \sqrt{r^2 + \alpha^2 - 2r - 2\alpha + 2} \quad [S7]$$

Substituting for  $\alpha^2$  we get KGE as a function of NSE:

$$KGE_{cb} = 1 - \sqrt{r^2 - 2r + 2r\alpha - NSE - 2\alpha + 2} \quad [S8]$$

Now  $r$  is defined as:

$$r = \frac{cov(o,s)}{\sigma_s \sigma_o} \quad [S9]$$

Where  $cov(o,s)$  is the covariance of observed and simulated (climatological) time series. Substituting  $\alpha$ :

$$r = \frac{cov(o,s)}{\sigma_s^2} \alpha \quad [S10]$$

For a climatological model, the covariance of the observed and simulated time series is equal to the variance in simulated time series. This can be shown as follows<sup>1</sup> (equations S11 to S20):

$$cov(o, s) = \frac{1}{n} \sum_{t=1}^n (s_t - \bar{s})(o_t - \bar{o}) \quad [S11]$$

Now consider that the observed time series is the climatological model  $s_t$  plus some zero-mean noise  $\epsilon_t$ :

$$o_t = s_t + \epsilon_t \quad [S12]$$

And:

$$\bar{s} = \bar{o} \quad [S13]$$

$$cov(o, s) = \frac{1}{n} \sum_{t=1}^n (s_t - \bar{s})(s_t + \epsilon_t - \bar{s}) \quad [S14]$$

Now expanding and simplifying:

$$cov(o, s) = \frac{1}{n} \sum_{t=1}^n ((s_t - \bar{s})^2 + \epsilon_t (s_t - \bar{s})) \quad [S15]$$

$$cov(o, s) = \sigma_s^2 + \frac{1}{n} \sum_{t=1}^n \epsilon_t (s_t - \bar{s}) \quad [S16]$$

Assuming a 365-day year and no missing data for any year, this summation can be written over  $d=365$  days and  $y=Y$  years.

---

<sup>1</sup> We used ChatGPT to assist with this derivation: <https://chatgpt.com/share/6839f23b-62fc-800c-b18a-48aa91df2b80>

$$cov(o, s) = \sigma_s^2 + \frac{1}{365 * Y} \sum_{d=1}^{365} \sum_{y=1}^Y \epsilon_{d,y} (s_d - \bar{s}) \quad [S17]$$

Since  $(s_d - \bar{s})$  depends only on d we can take it out of the right-most summation:

$$cov(o, s) = \sigma_s^2 + \frac{1}{365 * Y} \sum_{d=1}^{365} \left( (s_d - \bar{s}) \sum_{y=1}^Y \epsilon_{d,y} \right) \quad [S18]$$

By construction the noise is zero-mean,  $\sum_{y=1}^Y \epsilon_{d,y} = 0$ , so:

$$cov(o, s) = \sigma_s^2 \quad [S19]$$

Therefore equation S10 simplifies to:

$$r = \alpha \quad [S20]$$

And equation S4 simplifies to:

$$NSE_{cb} = r^2 = \alpha^2 \quad [S21]$$

Equation S8 can then be simplified:

$$KGE_{cb} = 1 - \sqrt{2} + \sqrt{2 \times NSE_{cb}} \quad [S22]$$

### Using leave-one-out cross-validation

In our analysis we used leave-one-out cross-validation to construct the climatological time series, which means that in equation S17 above we must replace  $(s_d - \bar{s})$  with  $(s_{d,y} - \bar{s}_y)$  since the climatology changes with each analysed year. The second term in equation S17 is then always less than or equal to zero, since the noise correlates negatively with the climatology.

In Figure S2 we plot the  $KGE_{cb}$  against the  $NSE_{cb}$  for the 20,338 catchments analyzed. For long time series The KGE approaches the ideal line (equation S22).

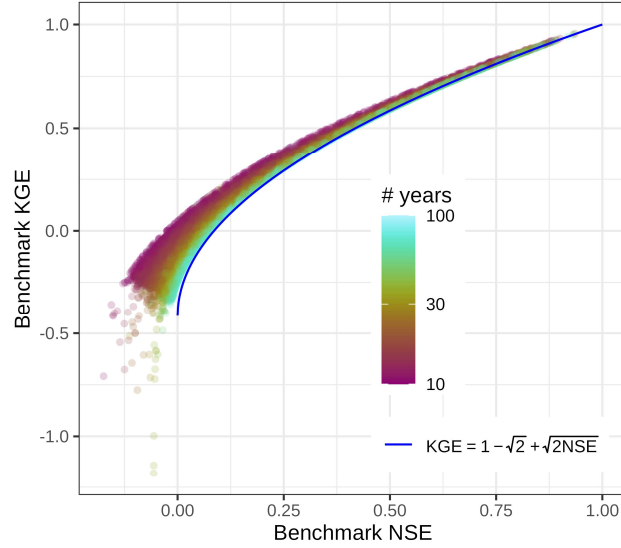

Figure S2: Scatterplot of benchmark KGE and NSE values. The idealized relationship is shown in blue, which is derived for a climatological model that is calculated and tested on the same data without cross-validation. For long time series the points plot near to the idealized line.

## S2: Relationship between benchmark NSE and climate indices

We calculated three climate indices for each catchment following Knoben et al. (2018). We used WorldClim 2.1 data (Fick and Hijmans, 2017) for temperature (T) and precipitation (P) and the Global Aridity and PET database (Zomer et al., 2022) for potential evaporation (PET). The resolution of these data are 30 seconds (approximately 1 km at the equator). All calculations are performed on the raster data and then the indices are averaged over each catchment.

First, Thornthwaite's moisture index  $MI(t)$  was calculated for each month.

$$MI(t) = \begin{cases} 1 - \frac{PET(t)}{P(t)}, & P(t) \geq PET(t) \\ \frac{P(t)}{PET(t)} - 1, & PET(t) < P(t) \end{cases} \quad [S23]$$

Then the aridity  $I_m$ , the seasonality  $I_{m,r}$ , and the fraction of precipitation as snow  $f_s$  are calculated:

$$I_m = \frac{1}{12} \sum_{t=1}^{12} MI(t) \quad [S24]$$

$$I_{m,r} = \max(MI(1,2, \dots, 12)) - \min(MI(1,2, \dots, 12)) \quad [S25]$$

$$f_s = \frac{\sum_{t=1}^{12} P(T(t) \leq 0^\circ C)}{\sum_{t=1}^{12} P(t)} \quad [S26]$$

Figure S3 shows scatterplots of the Benchmark NSE against these three climate indices. Figure S4 shows the benchmark NSE as a function of seasonality and snow fraction. We binned the catchments by  $I_{m,r}$  and  $f_s$  and took the median benchmark NSE for each 2D bin. Figure S5 shows the benchmark NSE as a function of seasonality and aridity, for snow-free catchments ( $f_s = 0$ ).

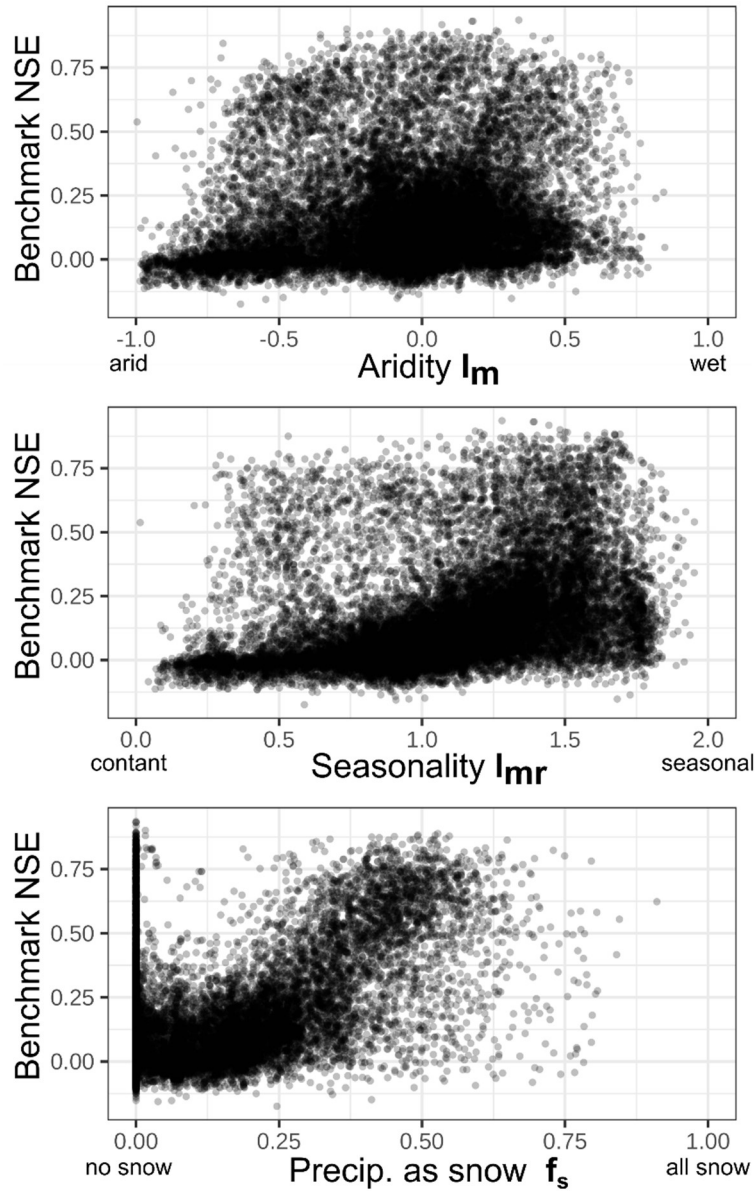

Figure S3: Scatterplots of the Benchmark NSE against aridity, aridity seasonality, and snow fraction. There is no clear relationship to aridity. Higher seasonality is associated with higher benchmark NSEs, but the relationship is noisy and many highly seasonal catchments have near-zero benchmark NSEs. On the other hand, increasing snow fraction (above about 0.25) is strongly associated with higher benchmark NSEs.

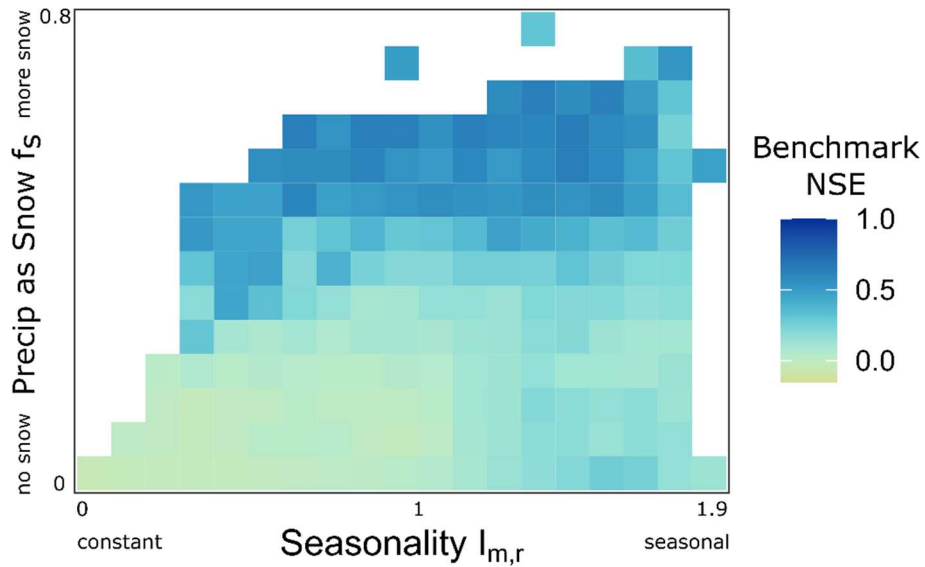

Figure S4: The median benchmark NSE for each cell in the climate space defined by seasonality  $I_{m,r}$  and fraction of precipitation as snow  $f_s$ . Catchments with higher snow fractions have higher benchmark NSEs. There is a slight gradient in the seasonality, with more seasonal catchments exhibiting slightly higher benchmark NSEs overall.

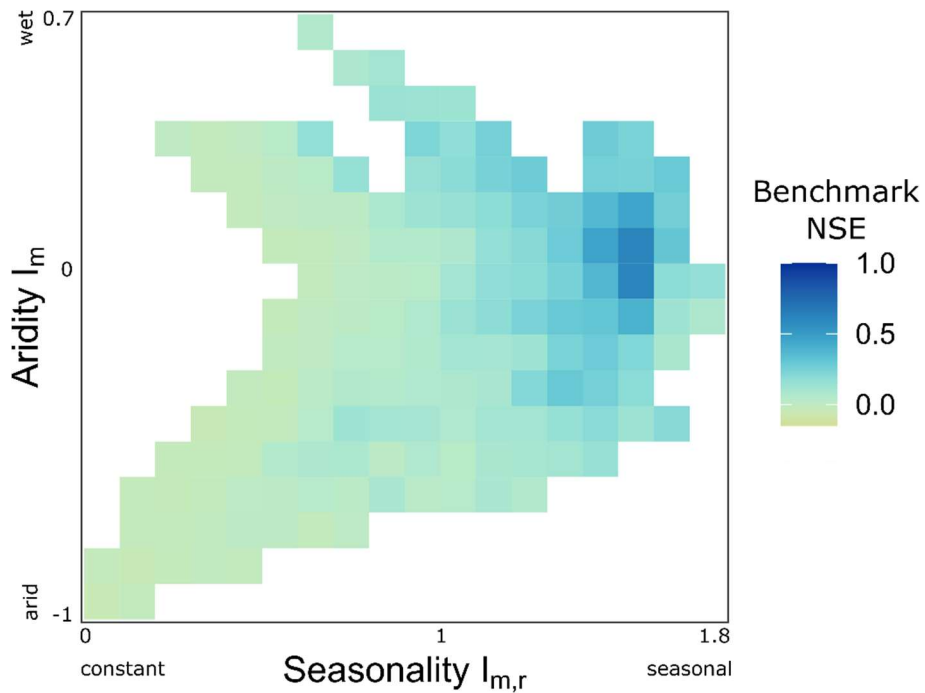

Figure S5: The median benchmark NSE for each cell in the climate space defined by seasonality and aridity, for catchments where the fraction of precipitation as snow is 0. In general more seasonal catchments have higher benchmark NSEs, although some very seasonal catchments have low benchmark NSEs.

### S3: Time Series decomposition

The time series decomposition consists of two steps, as outlined in Figure S6. First, the seasonal component is calculated by taking the interannual mean of each calendar day. The anomaly (non-seasonal component) is calculated by subtracting the seasonal component from the original time series.

Next, a Fast Fourier Transform (FFT) is applied to the anomalies. For a daily time series the FFT returns the amplitude associated with frequencies from 0 (DC component) to  $(2 \text{ day})^{-1}$ , where  $L$  is the length of the time series in days (Cooley and Tukey, 1965; R Core team, 2025). Then the inverse Fourier Transform is applied to two subsets of frequencies: (a) those greater than  $2 \text{ year}^{-1}$  and (b) those less than or equal to  $2 \text{ year}^{-1}$ . The resulting time series are labelled 'irregular' (high frequency) and 'interannual' (low frequency).

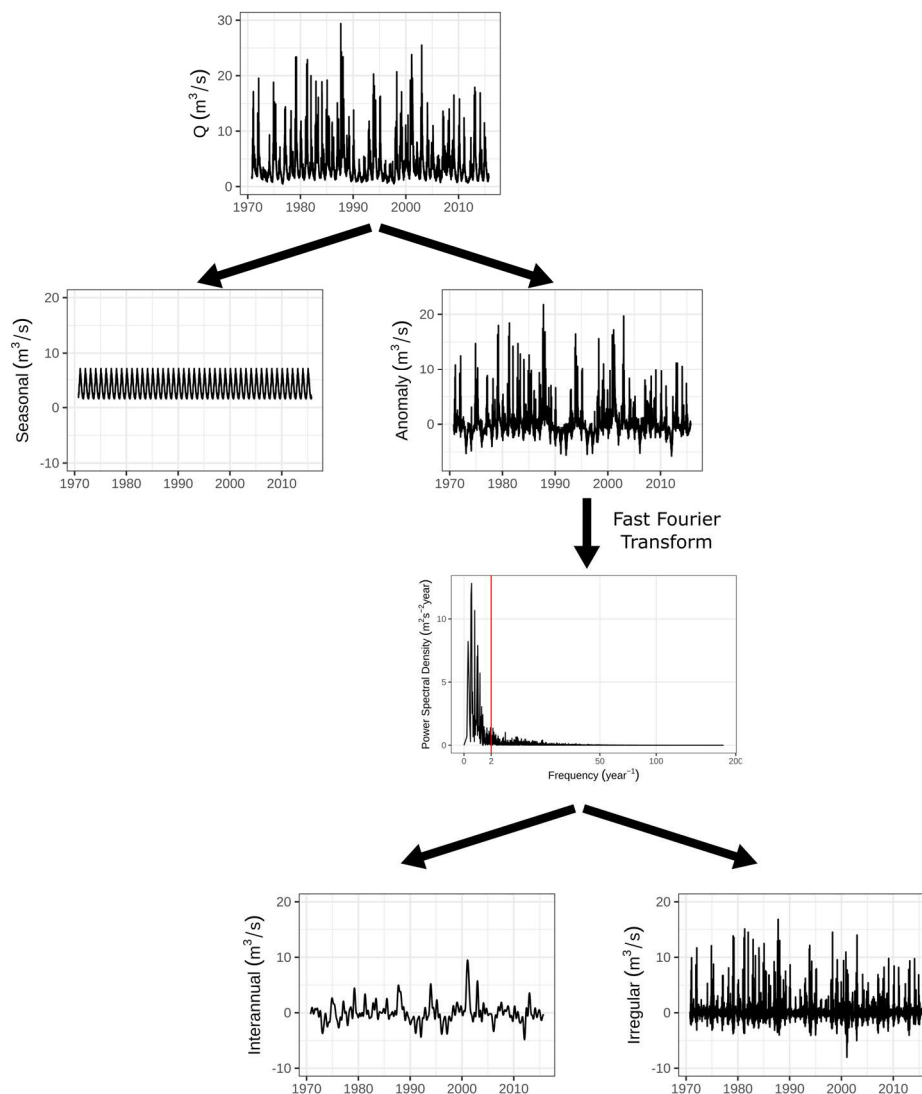

Figure S6: Flowchart of Fourier-based decomposition for Little Ouse at Abbey Heath (Camels-GB ID 33034). The variance fractions for this catchment are quite evenly distributed, at 0.38, 0.3, and 0.32 for the interannual, seasonal, and irregular components.

We considered decomposition based on two other algorithms: Classical decomposition and Seasonal-Trend decomposition with Loess (STL) (Cleveland et al., 1990; Kendall and Stuart, 1966; R Core team, 2025).

For the classical decomposition, we used a moving average of 365 days to calculate the trend (interannual) component.

For the STL method, we used a seasonal window of 365 days and a trend-cycle window of 7 years. This allows the seasonality to vary slowly with time. However, this differs from the way it is defined in our other methods, so we (i) calculated the anomalies from the seasonal component, (ii) subtracted the anomalies from the seasonal component, and (iii) added them to the interannual component.

In Figures S7-S9 below we provide the results of the three decompositions for the three catchments in Figure 1 of the main text. Note that the total variance in the classical decomposition is different from the total variance in the Fourier and STL methods because the moving average applied in the classical method requires discarding 182 days at the beginning and end of the time series.

In comparison to the Fourier method, classical decomposition tends to underestimate interannual variance and STL tends to overestimate it. The median interannual variance fractions are 0.13, 0.21, and 0.05 as calculated by Fourier, STL, and Classical decomposition methods (respectively) across 16858 catchments.

Seasonal variance fractions are very similar across the three methods, with medians of 0.17 for all methods.

The Classical decomposition method tends to overestimate the irregular variance fraction, while the STL method underestimates it, with median fractions of 0.65, 0.49, and 0.75 for the Fourier, STL, and Classical methods, respectively.

In Figure S10, we illustrate the three decomposition methods for Pine Nut CK NR Gardnerville, NV, which is an example of a stream where the non-orthogonality of the STL and classical decompositions is particularly obvious. For this catchment, the three STL variance fractions sum to 0.79 and the three classical variance fractions sum to 0.95. In contrast, the Fourier method will always lead to variance fractions that sum to 1.

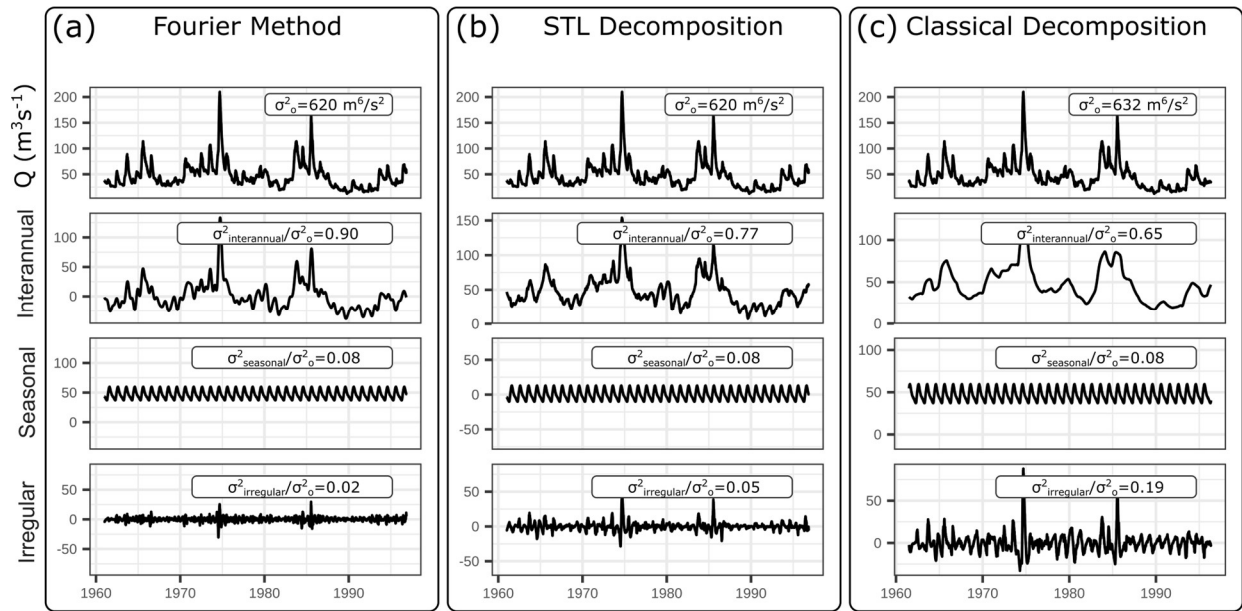

Figure S 7: Decomposition by Fourier method, STL decomposition, and classical decomposition for Sturgeon Weir River at the outlet of Amisk Lake, Water Survey of Canada ID 05KG002.

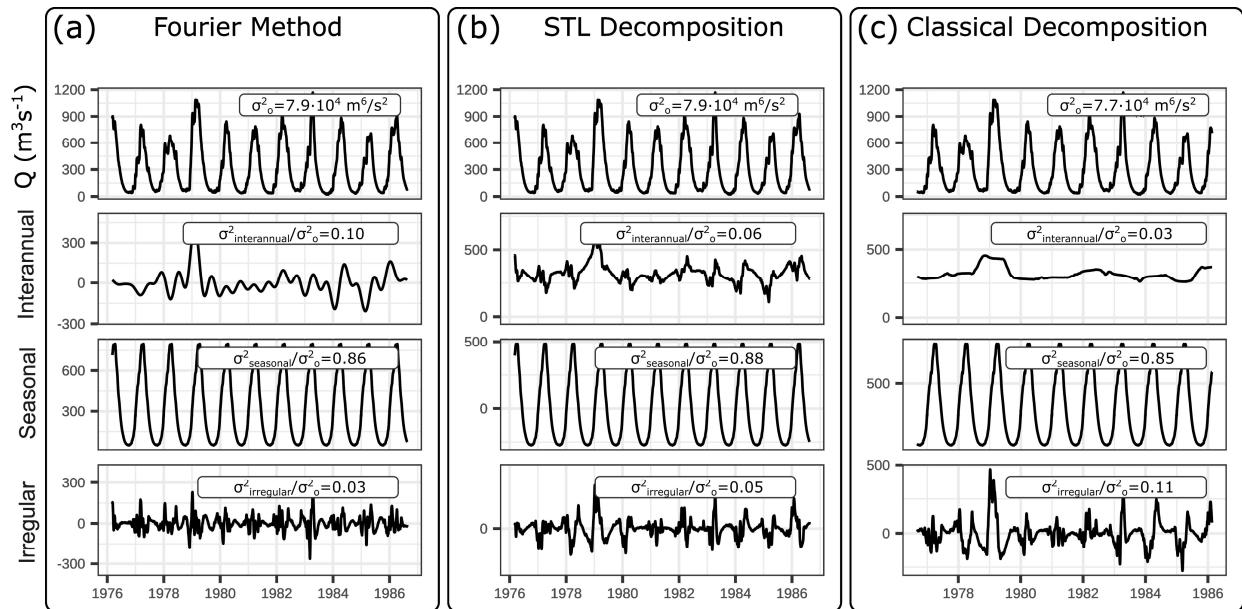

Figure S8: Decomposition by Fourier method, STL decomposition, and classical decomposition for Candeias River at Candeias do Jamari, Agência Nacional de Águas e Saneamento Básico ID 15550000.

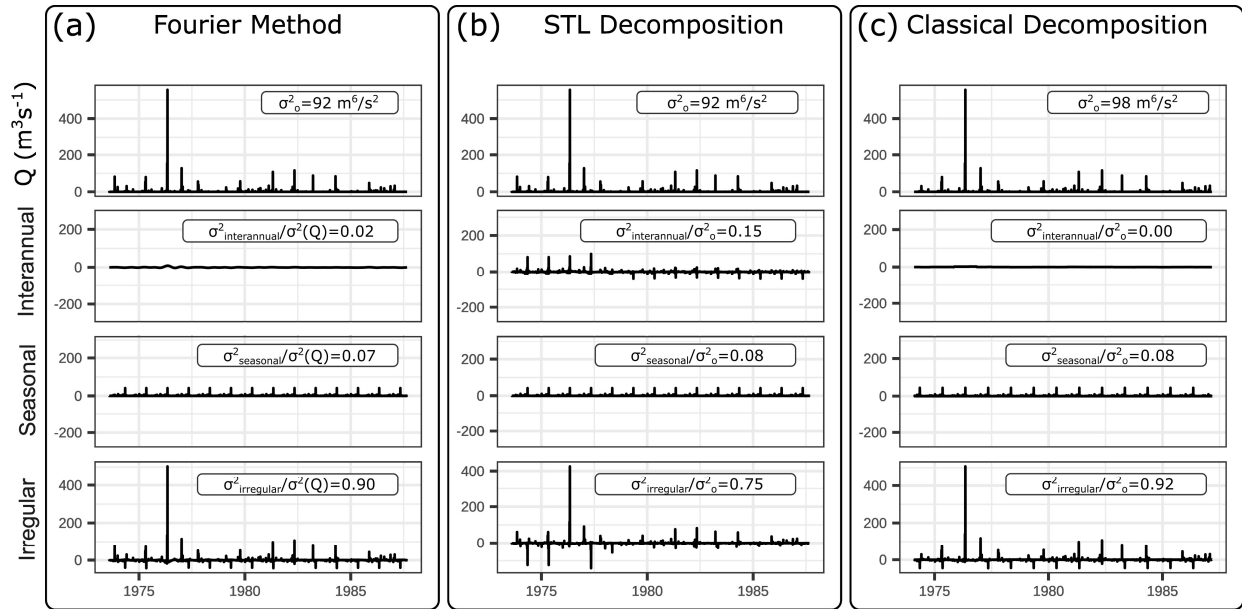

Figure S9: Decomposition by Fourier method, STL decomposition, and classical decomposition for Oued Kert at Driouch, an ephemeral stream in Morocco Global Runoff Data Centre ID 1304800.

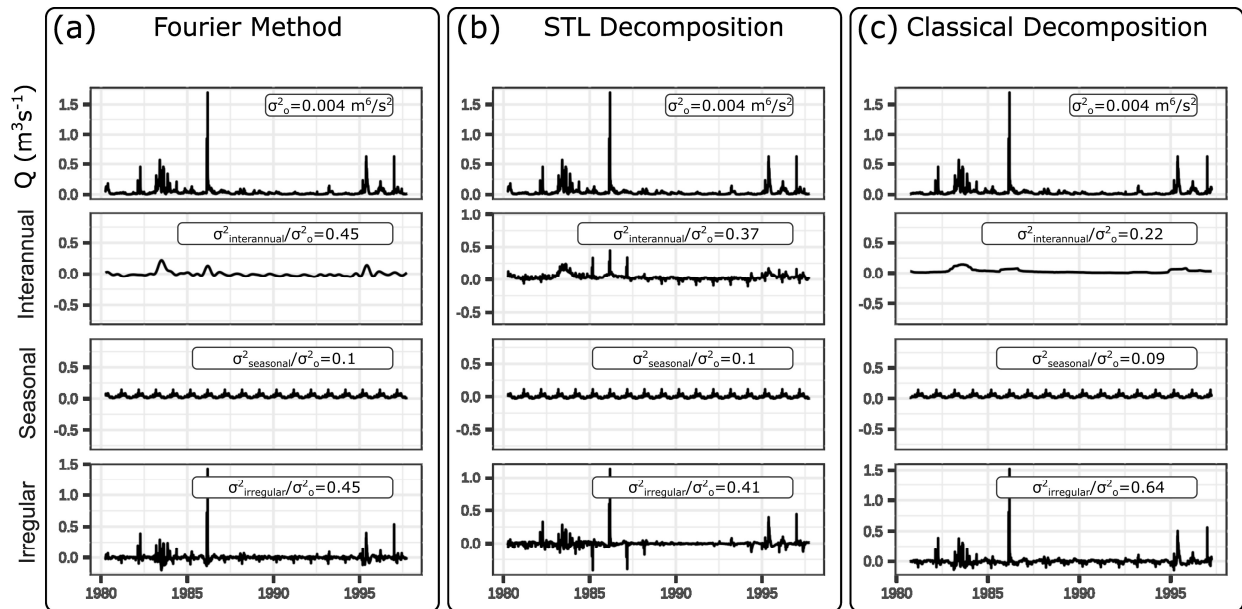

Figure S10: Decomposition by Fourier method, STL decomposition, and classical decomposition for Pine Nut CK NR Gardnerville, NV, USGS ID 10309050.

## S4: The overall NSE is the weighted mean of the component NSEs

We begin with the following definition for the NSE:

$$NSE = 1 - \frac{\sigma_{\epsilon}^2}{\sigma_o^2} \quad [S27]$$

Where  $\sigma_{\epsilon}^2$  is the error variance of the  $\sigma_o^2$  is the variance of the observations. Then replace  $\sigma_{\epsilon}^2$  by its definition:

$$NSE = 1 - \frac{1}{\sigma_o^2} \times \frac{1}{N-1} \sum_{t=1}^N (q_o - q_s)^2 \quad [S28]$$

Where  $q_o$  and  $q_s$  are the observed and simulated discharge.  $q_o$  and  $q_s$  can also be written as the sum of their components: interannual  $i_o$  and  $i_s$ , seasonal  $s_o$  and  $s_s$ , and irregular  $r_o$  and  $r_s$ .

$$NSE = 1 - \frac{1}{\sigma_o^2} \times \frac{1}{N-1} \sum_{t=1}^N (i_o + s_o + r_o - i_s - s_s - r_s)^2 \quad [S29]$$

We can expand the brackets and use the orthogonality of the decomposition to cancel terms. In particular, all cross-component terms (eg  $i_o \times s_o$  or  $i_o \times s_s$ ) can be cancelled because the decomposition (both the Fast Fourier Transform and the calculation of the seasonal component) is based on orthogonal basis functions<sup>2</sup>.

$$NSE = 1 - \frac{1}{\sigma_o^2} \times \frac{1}{N-1} \sum_{t=1}^N \left( \begin{array}{l} i_o^2 + i_o s_o + i_o r_o - i_o i_s - i_o s_s - i_o r_s + \\ s_o i_o + s_o^2 + s_o r_o - s_o i_s - s_o s_s - s_o r_s + \\ r_o i_o + r_o s_o + r_o^2 - r_o i_s - r_o s_s - r_o r_s + \\ -i_s i_o - i_s s_o - i_s r_o + i_s^2 + i_s s_s + i_s r_s + \\ -s_s i_o - s_s s_o - s_s r_o + s_s i_s + s_s^2 + s_s r_s + \\ -r_s i_o - r_s s_o - r_s r_o + r_s i_s + r_s s_s + r_s^2 \end{array} \right) \quad [S30]$$

$$NSE = 1 - \frac{1}{\sigma_o^2} \times \frac{1}{N-1} \sum_{t=1}^N (i_o^2 - 2i_o i_s + i_s^2 + s_o^2 - 2s_o s_s + s_s^2 + r_o^2 - 2r_o r_s + r_s^2) \quad [S31]$$

$$NSE = 1 - \frac{1}{\sigma_o^2} \times \frac{1}{N-1} \sum_{t=1}^N \{(i_o - i_s)^2 + (s_o - s_s)^2 + (r_o - r_s)^2\} \quad [S32]$$

We can define the error variance of the interannual, seasonal, and irregular components as  $\sigma_{\epsilon,i}^2$ ,  $\sigma_{\epsilon,s}^2$ , and  $\sigma_{\epsilon,r}^2$ , respectively:

$$\sigma_{\epsilon,i}^2 = \frac{1}{N-1} \sum_{t=1}^N (i_o - i_s)^2 \quad [S33]$$

$$\sigma_{\epsilon,s}^2 = \frac{1}{N-1} \sum_{t=1}^N (s_o - s_s)^2 \quad [S34]$$

$$\sigma_{\epsilon,r}^2 = \frac{1}{N-1} \sum_{t=1}^N (r_o - r_s)^2 \quad [S35]$$

Then rewrite equation S32:

---

<sup>2</sup> This ignores leap years and assumes an integer number of years of data. In practice when each year does not have exactly 365 days there can be small deviations from orthogonality. However, we found that these effects are negligible: across 16988 modeled catchments from the 18 models that we analysed, equation S39 was always accurate within an error of  $3 \times 10^{-8}$ .

$$NSE = 1 - \frac{\sigma_{\epsilon,i}^2 + \sigma_{\epsilon,s}^2 + \sigma_{\epsilon,r}^2}{\sigma_o^2} \quad [S36]$$

Using the fact that the sum of the variance fractions is 1:

$$NSE = \frac{\sigma_{interannual}^2 + \sigma_{seasonal}^2 + \sigma_{irregular}^2}{\sigma_o^2} - \frac{\sigma_{\epsilon,i}^2 + \sigma_{\epsilon,s}^2 + \sigma_{\epsilon,r}^2}{\sigma_o^2} \quad [S37]$$

$$NSE = \frac{\sigma_{interannual}^2}{\sigma_o^2} \left(1 - \frac{\sigma_{\epsilon,i}^2}{\sigma_{interannual}^2}\right) + \frac{\sigma_{seasonal}^2}{\sigma_o^2} \left(1 - \frac{\sigma_{\epsilon,s}^2}{\sigma_{seasonal}^2}\right) + \frac{\sigma_{irregular}^2}{\sigma_o^2} \left(1 - \frac{\sigma_{\epsilon,r}^2}{\sigma_{irregular}^2}\right) \quad [S38]$$

$$NSE = \frac{\sigma_{interannual}^2}{\sigma_o^2} NSE_{interannual} + \frac{\sigma_{seasonal}^2}{\sigma_o^2} NSE_{seasonal} + \frac{\sigma_{irregular}^2}{\sigma_o^2} NSE_{irregular} \quad [S39]$$

Equation S39 is the weighted sum of the component NSEs, so we are done.

### Comparison to the Divide and Measure Non-Conformity

The behaviour observed in Figure 3 of the main text has some similarities to the divide and measure non-conformity (DAMN) described by Klotz et al. (2024). The DAMN describes the counterintuitive result that dividing a time series into shorter periods can result in lower NSEs for all partitions than for the full time series. This results from the fact that different partitions can have very different variances.

In contrast, we showed that the NSE of interannual, seasonal, and irregular components can diverge significantly from the overall NSE. However, in contrast to the DAMN, the overall NSE here *is* bounded by the NSEs of the three components: specifically, the overall NSE is equal to the weighted mean of the three component NSEs. Therefore, for a given overall NSE, a higher seasonal NSE must be associated with a lower interannual and/or irregular NSE.

## S5: Model Details

Table S1: Details for the 18 models used. ‘Model’ indicates the abbreviated name used for each model in the manuscript. ‘Type’ is the class of model. ‘Calibration’ indicates whether the model was calibrated globally (one model for all catchments) or basin-wise (a different set of parameters for each catchment). ‘Training-testing split’ indicates if an independent ‘testing’ subset of the streamflow observations and simulations was used in this paper, either ‘Ungauged basins’, where a subset of catchments was held out from training/calibration, or ‘independent testing period’, where a subset of years was held out. The number of evaluation catchments is the number of catchments that have at least 10 years of continuous observed and simulated discharge data and were used in this study. ‘Region’ is the geographical coverage of the model. ‘Percent highly seasonal’ is the percentage of evaluation catchments with a seasonal variance fraction greater than 0.5. ‘Anthropogenic impacts on catchments’ indicates whether the sample of catchments used in this work included human-impacted catchments. For some models, we used only a subset of near-natural catchments from the full set of catchments simulated by the model.

| Model                 | Type                     | Calibration | Training/testing split     | Region                     | Number of evaluation catchments | Percent highly seasonal | Anthropogenic impacts on catchments                             | Model reference          |
|-----------------------|--------------------------|-------------|----------------------------|----------------------------|---------------------------------|-------------------------|-----------------------------------------------------------------|--------------------------|
| GLOB-LSTM1            | Lumped LSTM              | Global      | Ungauged basins            | Global                     | 3752                            | 19%                     | Includes human-influenced catchments                            | (Nearing et al., 2024)   |
| GLOB-LSTM2            | Lumped LSTM              | Global      | Ungauged Basins            | Global                     | 3167                            | 9%                      | Low influence (Yang et al., 2025)                               | (Yang et al., 2025)      |
| BR-LSTM               | Lumped LSTM              | Global      | Independent testing period | Brazil                     | 176                             | 7%                      | Low influence <sup>3</sup>                                      | Section S5               |
| CH-LSTM               | Lumped LSTM              | Global      | Ungauged basins            | Switzerland                | 98                              | 27%                     | Near-natural (Kraft et al., 2025)                               | (Kraft et al., 2025)     |
| ENA-LSTM              | Lumped LSTM              | Global      | Ungauged basins            | Northeast North America    | 79                              | 39%                     | Near-natural (Falcone, 2011; Pellerin and Nzokou Tanekou, 2020) | (Arsenault et al., 2023) |
| US-LSTM               | Lumped LSTM              | Global      | Independent testing period | Conterminous United States | 531                             | 9%                      | Near-natural (Newman et al., 2015)                              | (Kratzert et al., 2024)  |
| US- $\delta$ HBV2.0UH | Hybrid: Semi-distributed | Global      | Some overlap between       | Conterminous United States | 1131                            | 9%                      | Near-natural (Falcone, 2011)                                    | (Song et al., 2025)      |

<sup>3</sup> Evaluated on catchments with no regulation, <5% impervious surfaces, and consumptive use less than 5% of streamflow.

|             |                                      |        |                                                  |                            |      |     |                                      |                                              |
|-------------|--------------------------------------|--------|--------------------------------------------------|----------------------------|------|-----|--------------------------------------|----------------------------------------------|
|             | differentiable process-based model   |        | training and testing basins and periods          |                            |      |     |                                      |                                              |
| GLOB-GloFAS | Distributed process-based model      | Global | Some overlap between training and testing basins | Global                     | 2741 | 22% | Includes human-influenced catchments | (Nearing et al., 2024)                       |
| BR-MGB-SA   | Semi-distributed process-based model | Global | No split                                         | Brazil                     | 33   | 24% | Low influence <sup>4</sup>           | (Chagas et al., 2020; Siqueira et al., 2018) |
| CE-COSERO   | Lumped process-based model           | Basin  | Independent testing period                       | Central Europe             | 454  | 9%  | Near-natural (Klingler et al., 2021) | (Klingler et al., 2021)                      |
| CH-PREVAH   | Distributed process-based model      | Global | No split                                         | Switzerland                | 98   | 27% | Near-natural (Kraft et al., 2025)    | (Kraft et al., 2025)                         |
| US-NHM      | Distributed process-based model      | Global | No split                                         | Conterminous United States | 1340 | 9%  | Near-natural (Falcone, 2011)         | (Regan et al., 2019)                         |
| US-FUSE     | Lumped process-based model           | Basin  | Independent testing period                       | Conterminous United States | 576  | 10% | Near-natural (Newman et al., 2015)   | (Kratzert, 2019)                             |
| US-HBV      | Lumped process-based model           | Basin  | Independent testing period                       | Conterminous United States | 671  | 10% | Near-natural (Newman et al., 2015)   | (Kratzert, 2019; Seibert et al., 2018)       |
| US-mHM      | Lumped process-based model           | Basin  | Independent testing period                       | Conterminous United States | 492  | 8%  | Near-natural (Newman et al., 2015)   | (Kratzert, 2019; Mizukami et al., 2019)      |
| US-SAC-SMA  | Lumped process-based model           | Basin  | Independent testing period                       | Conterminous United States | 671  | 10% | Near-natural (Newman et al., 2015)   | (Kratzert, 2019; Newman et al., 2017)        |
| US-VIC      | Lumped process-based model           | Basin  | Independent testing period                       | Conterminous United States | 670  | 10% | Near-natural (Newman et al., 2015)   | (Kratzert, 2019; Newman et al., 2017)        |

<sup>4</sup> Evaluated on catchments with no regulation, <5% impervious surfaces, and consumptive use less than 5% of streamflow.

|            |                                 |        |          |                       |    |     |                                                                 |                         |
|------------|---------------------------------|--------|----------|-----------------------|----|-----|-----------------------------------------------------------------|-------------------------|
| WNA-VIC-GI | Distributed process-based model | Global | No Split | Western North America | 84 | 85% | Near-natural (Falcone, 2011; Pellerin and Nzokou Tanekou, 2020) | (Schnorbus, 2018, 2020) |
|------------|---------------------------------|--------|----------|-----------------------|----|-----|-----------------------------------------------------------------|-------------------------|

## S6: Comparing Goodness-of-fit statistics for models based on different thresholds and indices

The following figures show alternative versions of Figure 3 in the paper, using different thresholds (seasonal variance fraction of 0.4 and 0.6) and different indices (the streamflow concentration index QCI, the coefficient of variation of the streamflow (COV(Q)), the fraction of precipitation as snow ( $f_s$ ) and the aridity seasonality index  $I_{m,r}$ ).

$f_s$  and  $I_{m,r}$  are defined above. The streamflow concentration index is defined following Han et al (2024):

$$QCI = \frac{\sum_{i=1}^{12} Q_i^2}{(\sum_{i=1}^{12} Q_i)^2} \times 100 \quad [S40]$$

Where  $Q_i$  is the monthly climatological streamflow. QCI ranges from a theoretical minimum value of 8.3 (constant streamflow throughout the year) to a maximum of 100 (all streamflow occurs in one month).

We chose to use the coefficient of variation of the streamflow (COV(Q)) because the COV has been used to measure seasonality in precipitation (eg. Fick & Hijmans, 2017). We calculate the COV of the climatological streamflow  $Q_d$  (the interannual mean of each calendar day). For leap years both December 30 and 31 were used as the 365<sup>th</sup> day of the year.

$$COV(Q) = \frac{\sigma(\bar{Q}_d)}{\mu(\bar{Q}_d)}, d = 1, 2, \dots, 365 \quad [S41]$$

# NSE calculated for each interannual signature metric

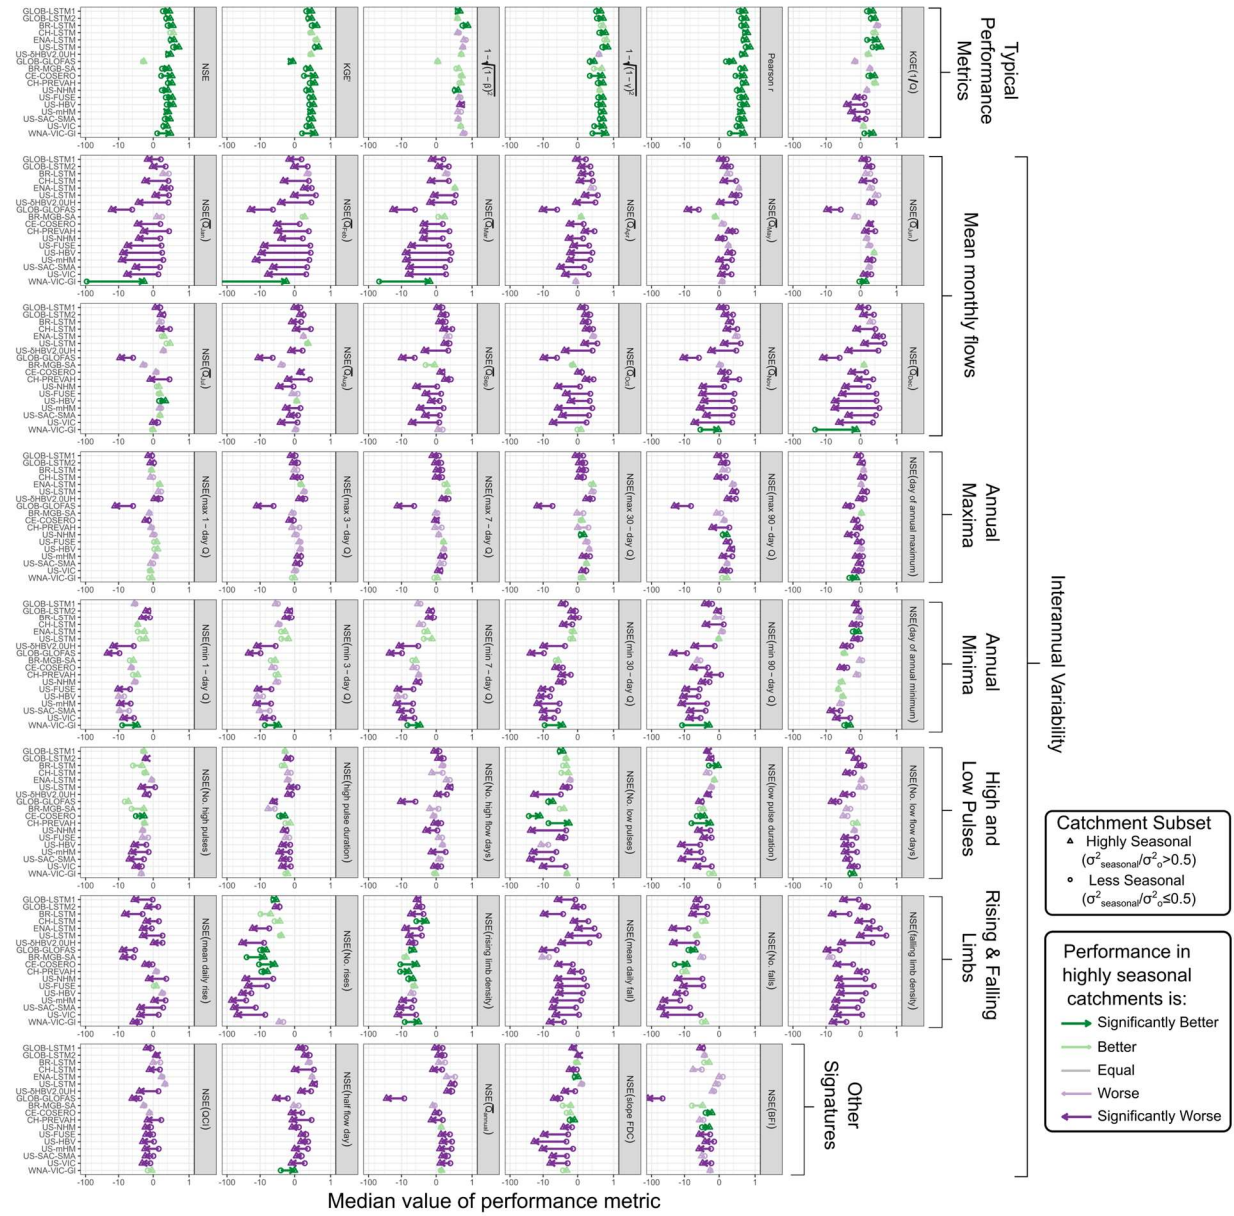

Figure S11: Equivalent to Figure 4 in text but using the NSE of each interannual metric, rather than the correlation. Note that many values are negative, but the overall pattern is similar.

### Comparison: Seasonal Variance Fraction $\geq/\leq 0.4$

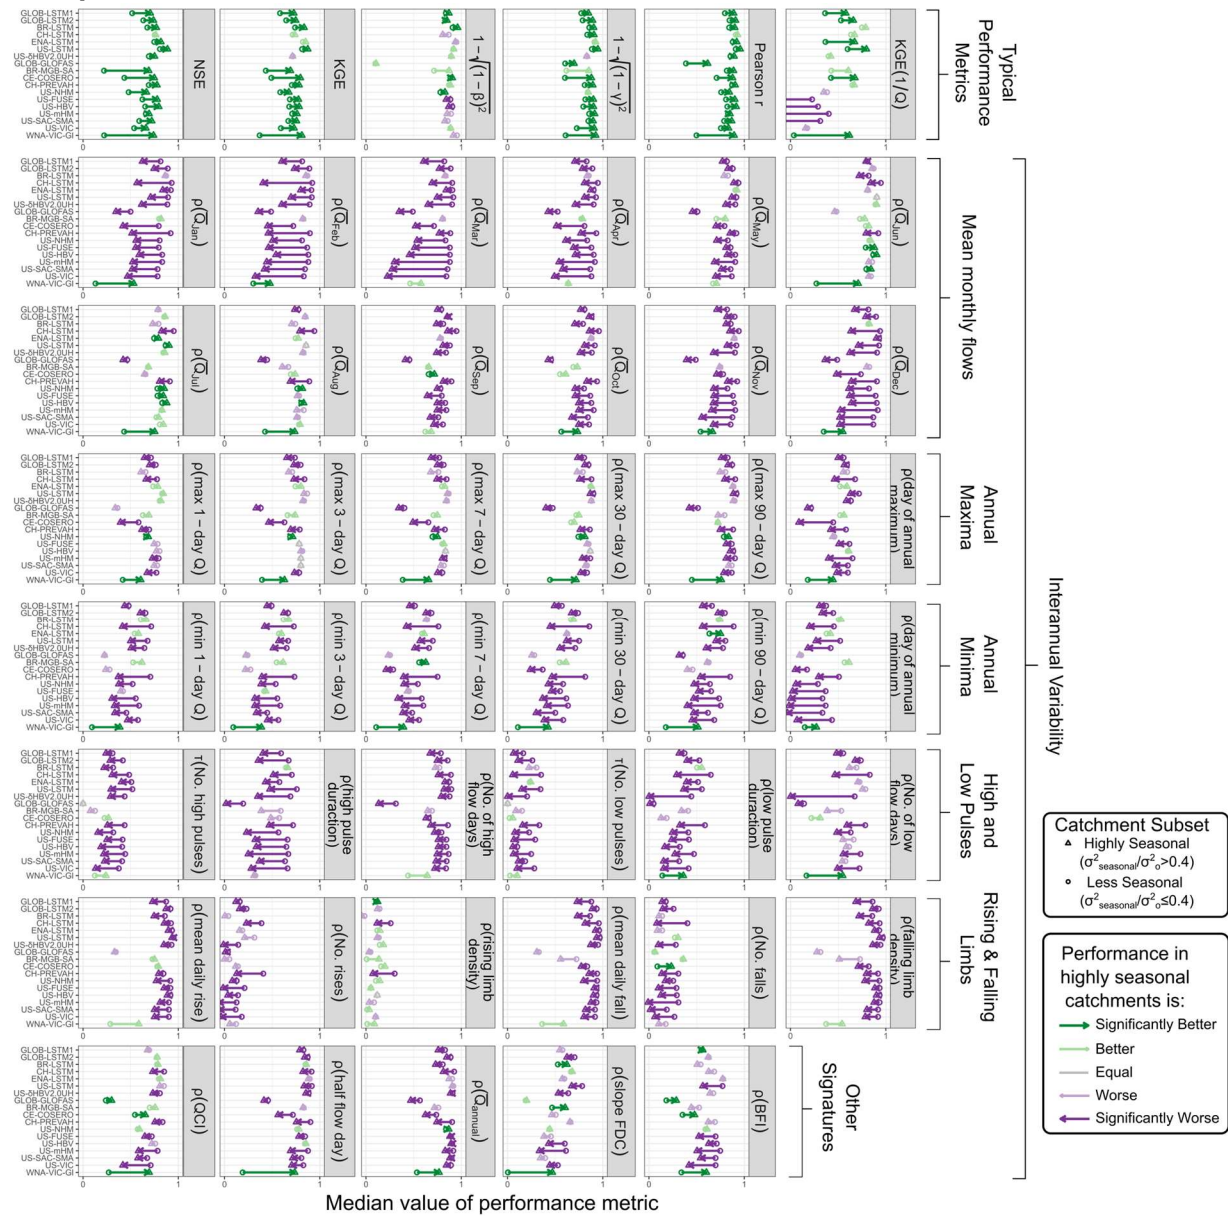

Figure S12: Equivalent to Figure 4 in text but using a threshold of 0.4 for the benchmark NSE to divide catchments into high-benchmark and low-benchmark groups.

### Comparison: Seasonal Variance Fraction $\geq/\leq 0.6$

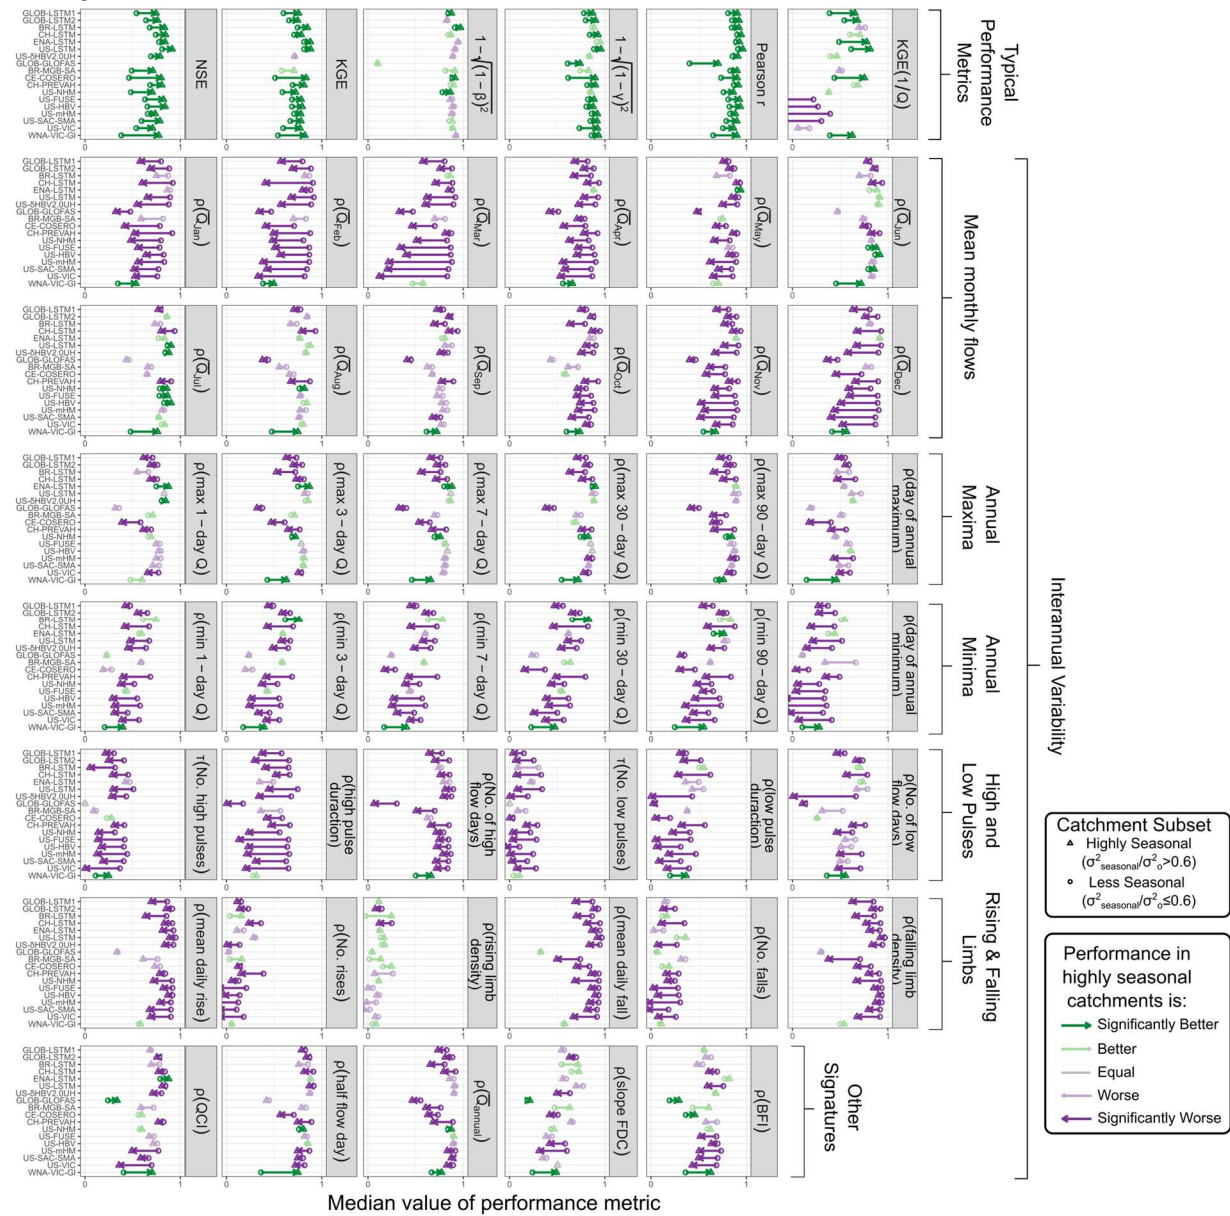

Figure S13: Equivalent to Figure 4 in text but using a threshold of 0.6 for the benchmark NSE to divide catchments into high-benchmark and low-benchmark groups.

### Comparison: QCI >/≤ 15

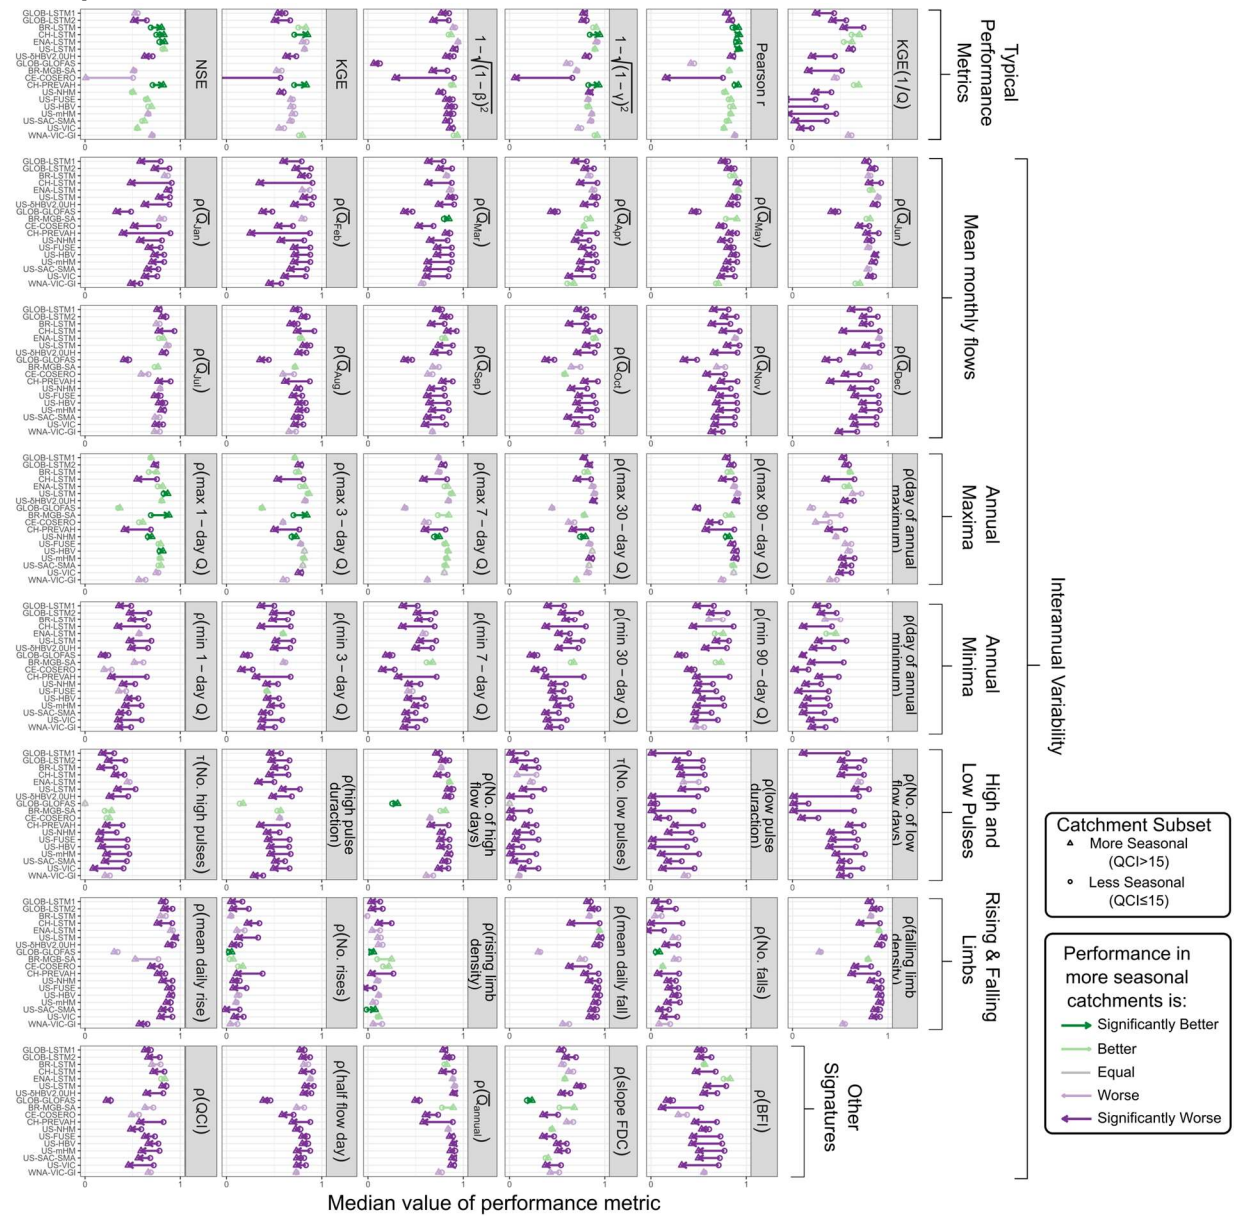

Figure S14: Equivalent to Figure 4 in text but catchments are divided by the streamflow concentration index (QCI) using a threshold of 15.

# Comparison: COV(Q) >/≤ 1

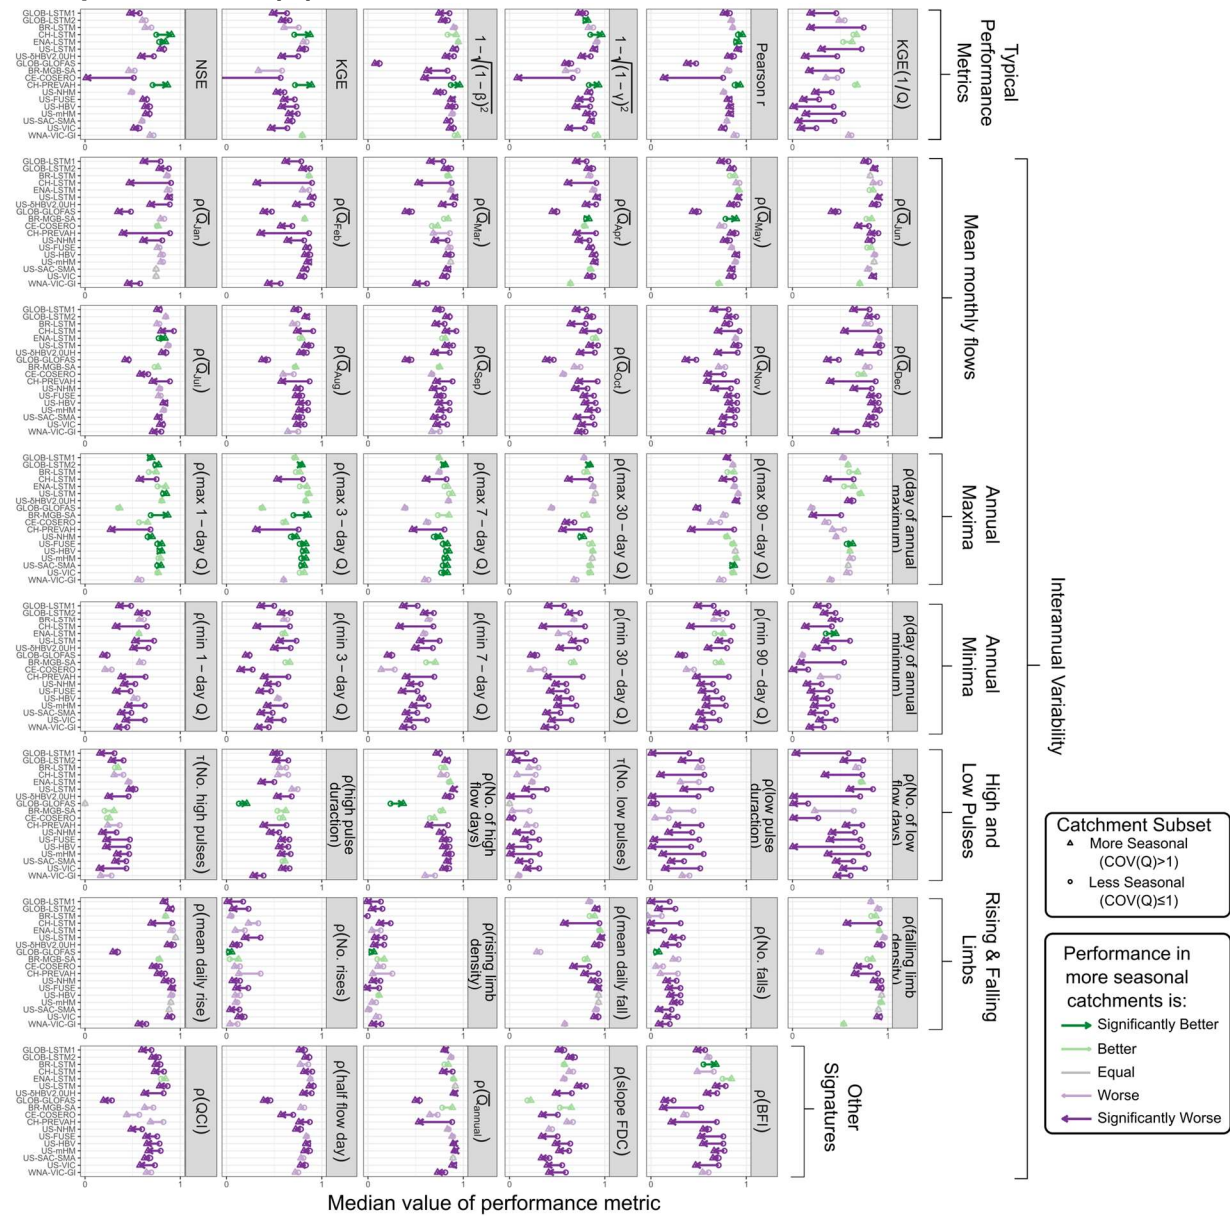

Figure S15: Equivalent to Figure 4 in text but catchments are divided by the coefficient of variation of the mean annual hydrograph (COV(Q)) using a threshold of 1.

### Comparison: $f_s > \leq 0.5$

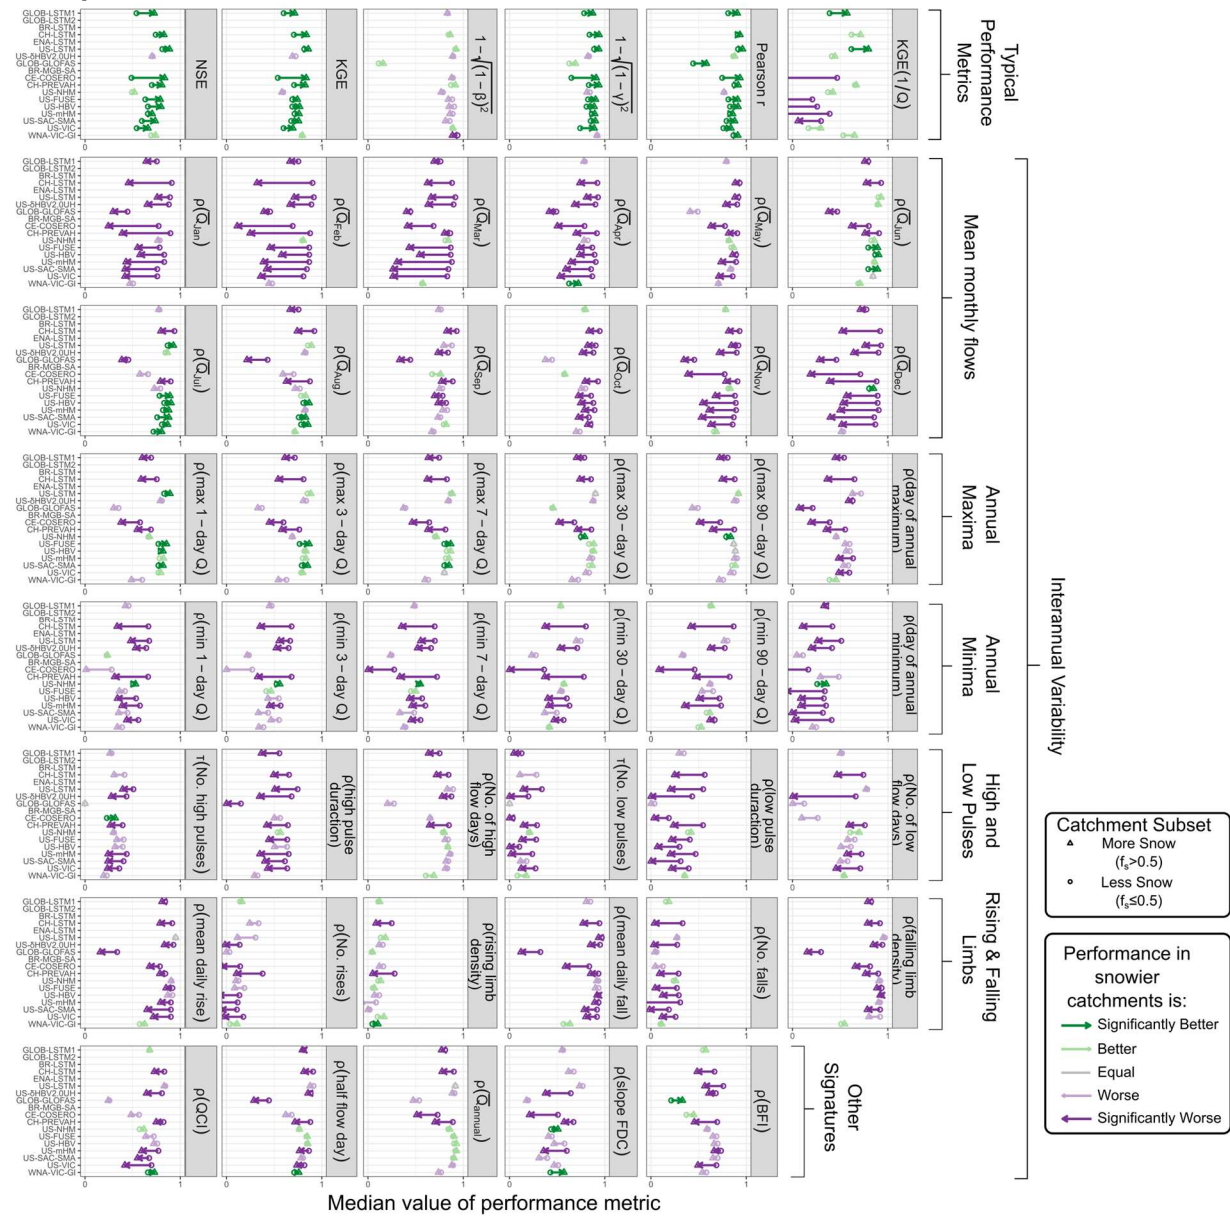

Figure S16: Equivalent to Figure 4 in text but catchments are divided into snowier and less snowy groups using a threshold of 0.5 for the snow fraction ( $f_s$ ).

# Comparison: $I_{m,r} > / \leq 1$

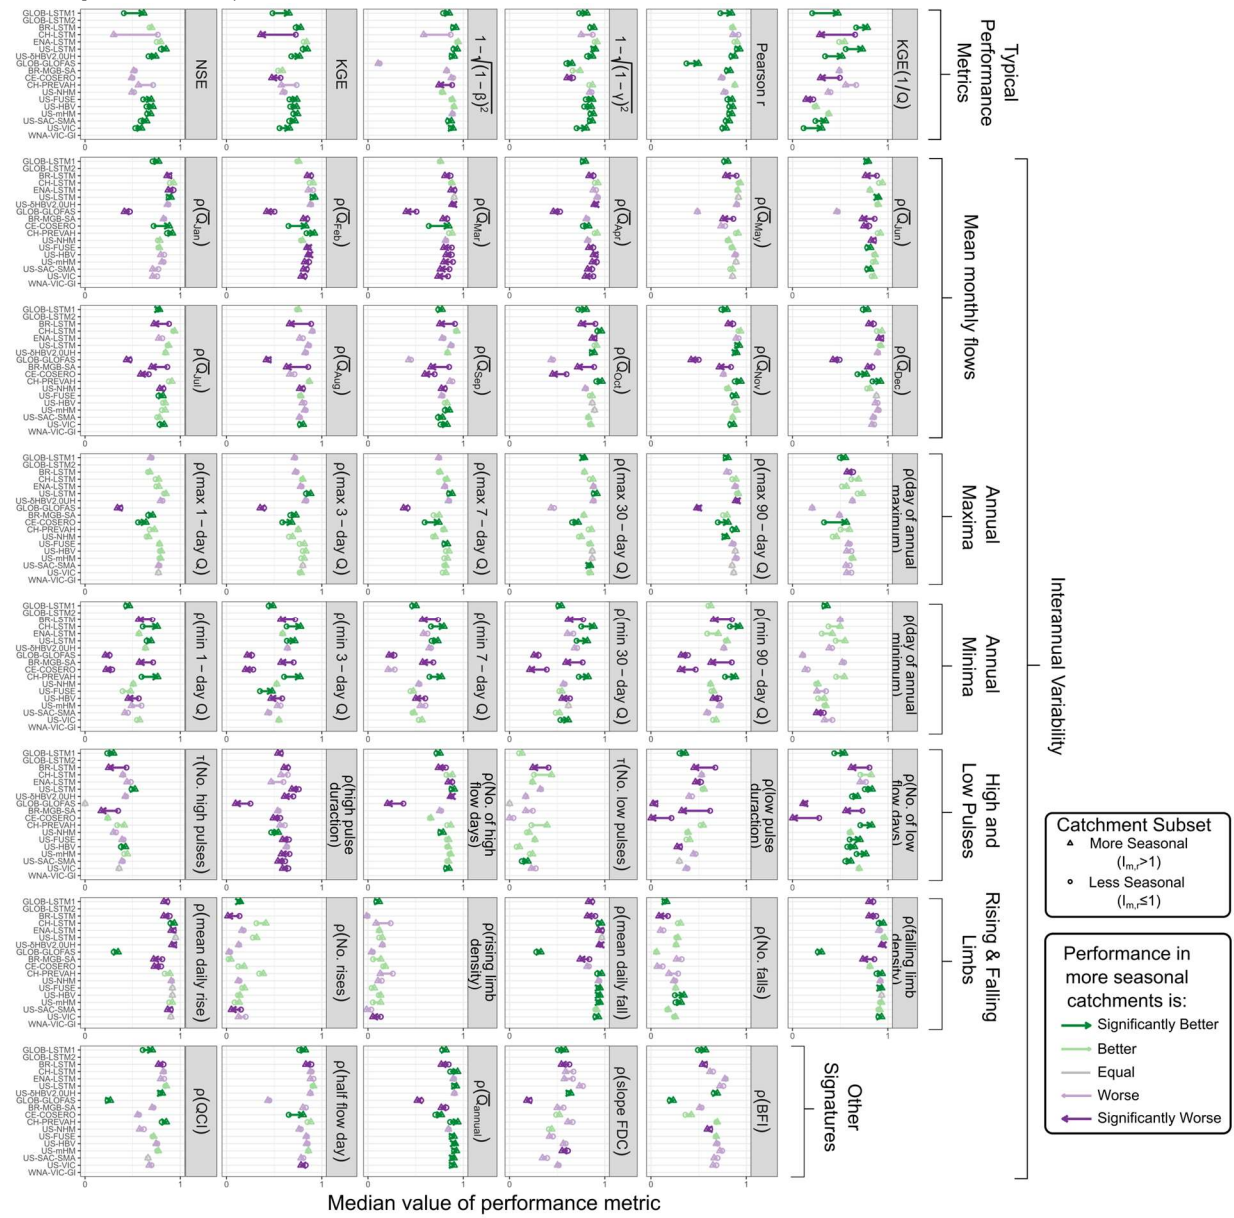

Figure S17: Equivalent to Figure 4 in text but catchments are divided more seasonal and less seasonal groups using a threshold of 1 for the aridity seasonality index ( $I_{m,r}$ ).

## **S7: Long Short-Term Memory model for Brazil**

Since we identified Brazil as a location with very high benchmark NSE values, as well as a large amount of good-quality data, we wanted to include some models from Brazil in our analysis. Unfortunately we were unable to find any freely accessible machine learning hydrologic models that included catchments from across Brazil, so we created a Long Short-Term Memory (LSTM) model using the Camels-BR dataset, version 1.2 (Chagas et al., 2020, 2025)

We created an LSTM using the neuralhydrology package for Python (Kratzert et al., 2022). We used data from the period 01/01/1980 to 30/12/2020, which represents a compromise between maximizing record length and maximizing the number of available input datasets. The Camels-BR dataset includes streamflow and meteorological data for 897 catchments, and we used all catchments for training, validation, and testing. We trained on data from 2010-2020, validated on data from 1980-1989, and tested on data from 1990-2009. We reserved a long period (20 years) for testing because the objective here is to analyse differences in testing performance across catchment types, and not necessarily to maximize the model performance overall.

We included all available static attributes in the model, in addition to one-hot encoding for the basin ID.

For dynamic attributes we included all variables that were available for the full 41-year period. These are summarized in Table S2.

Table S2: Dynamic Variables used in the LSTM

| Variable                     | Source(s)                                                                            |
|------------------------------|--------------------------------------------------------------------------------------|
| Precipitation                | CHIRPS <sup>1</sup> , CPC <sup>2</sup> , ERA5-Land <sup>3</sup> , MSWEP <sup>4</sup> |
| Minimum Temperature          | CPC <sup>2</sup> , ERA5-Land <sup>3</sup>                                            |
| Maximum Temperature          | CPC <sup>2</sup> , ERA5-Land <sup>3</sup>                                            |
| Mean Temperature             | ERA5-Land <sup>3</sup>                                                               |
| Actual Evapotranspiration    | Gleam <sup>5</sup> , ERA5-Land <sup>3</sup>                                          |
| Potential Evapotranspiration | Gleam, ERA5-Land <sup>3</sup>                                                        |
| Soil Moisture (surface)      | Gleam <sup>5</sup>                                                                   |
| Soil Moisture (root zone)    | Gleam <sup>5</sup>                                                                   |
| Soil Moisture (layers 1-4)   | ERA5-Land <sup>3</sup>                                                               |

<sup>1</sup>(Funk et al., 2015), <sup>2</sup>(Chen and Xie, 2008; CPC Global Unified Temperature, 2025), <sup>3</sup>(Muñoz Sabater, 2019), <sup>4</sup>(Beck et al., 2019) <sup>5</sup>

The most important hyperparameters are summarized below in Table S2.

Table S3: Hyperparameters used in the LSTM

| Hyperparameter      | Value                                                            |
|---------------------|------------------------------------------------------------------|
| Hidden size         | 256                                                              |
| Batch size          | 256                                                              |
| Sequence length     | 365                                                              |
| Initial forget bias | 3                                                                |
| Output dropout      | 0.4                                                              |
| Output activation   | Linear                                                           |
| Optimizer           | Adam                                                             |
| Loss                | NSE                                                              |
| Epochs              | 50                                                               |
| Learning rate       | 1e-4 (epochs 1-30)<br>1e-5 (epochs 31-40)<br>5e-6 (epochs 41-50) |

These values are typical for LSTMs (eg. Kratzert et al., 2024). We did not tune the hyperparameters except for the learning rate, which we reduced because with a typical learning rate of 1e-3, the maximum validation NSE occurred on the first epoch. Even with the reduced learning rate the maximum validation NSE tended to occur within the first ten epochs. Further reductions to the learning rate resulted in a lower maximum validation NSE.

We generated an ensemble of five models with the same hyperparameters, and averaged the predictions.

The validation and testing NSE of the ensemble model are shown in Figure S10. The median validation NSE is 0.75, while the median test NSE is 0.72.

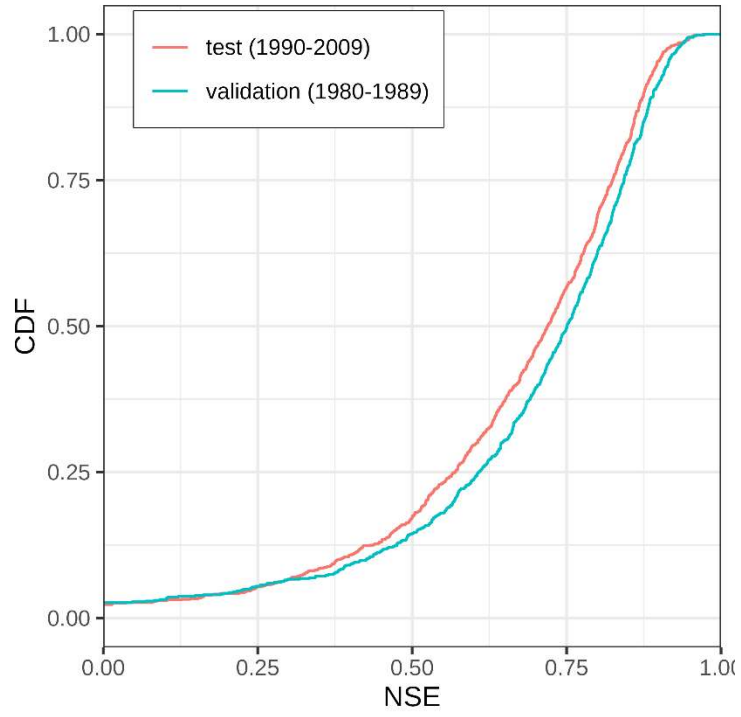

Figure S18: The empirical cumulative density function of NSE values for the ensemble LSTM model.

## S8: Variance Components

Figure S19 shows histograms of the three variance components for 17,245 catchments. Figures S15 to S32 show examples of decomposed time series for 18 example catchments from around the world. Figures S20-S25 show catchments with high interannual variance, Figs. S26-S31 show catchments with high irregular variance, and Figs. S32-S38 show catchments with high seasonal variance. The examples were not chosen systematically but are intended to represent a broad geographical range.

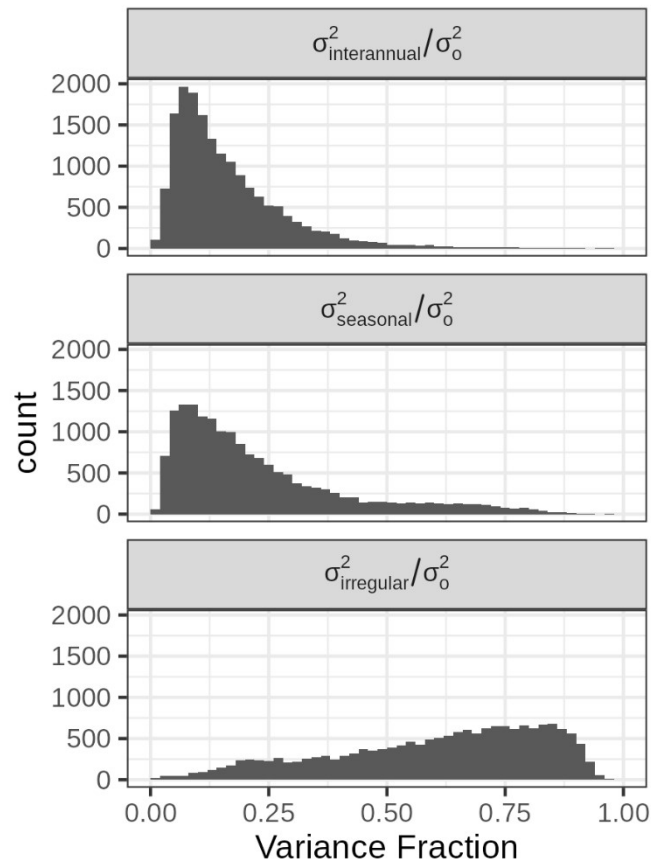

Figure S19: The distribution of variance fractions for all 17,245 catchments plotted in Figure 1 of the manuscript.

## S6.1: Examples of interannually variable streams

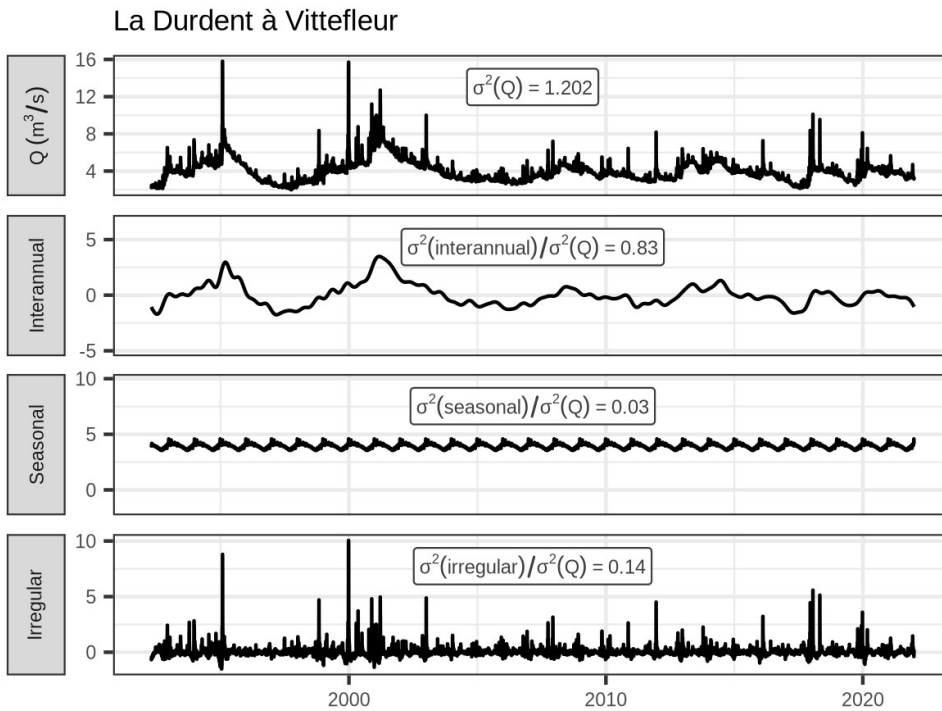

Figure S20: Decomposed time series for La Durdent à Vittefleury (Sandre G600061010), an interannually variable stream in Normandy, France.

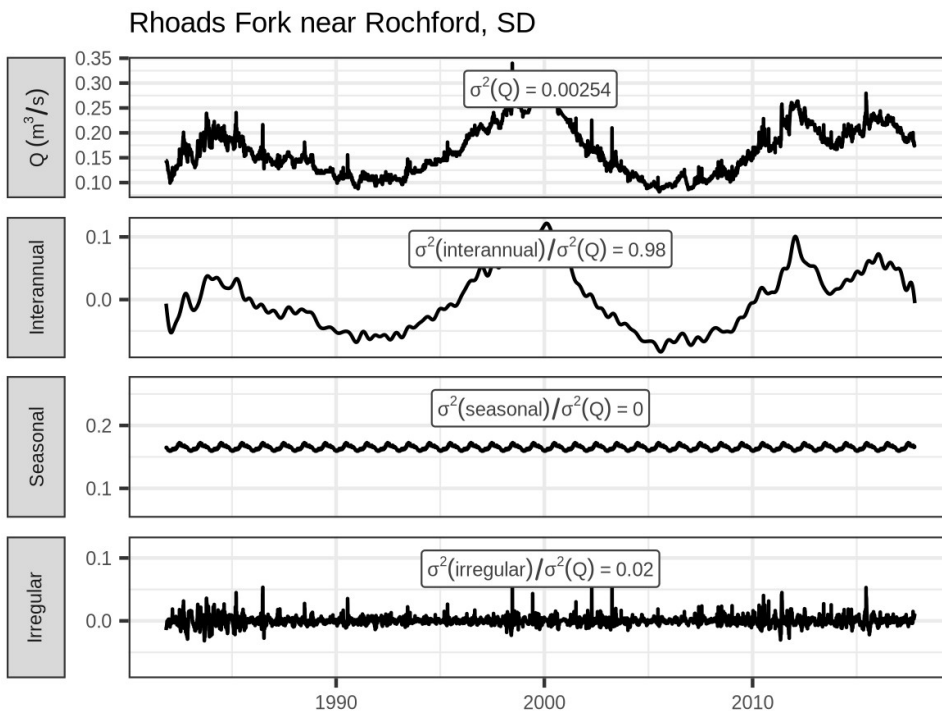

Figure S21: Decomposed time series for Rhoads Fork Near Rochford, SD (USGS 06408700), an interannually variable stream in South Dakota, United States.

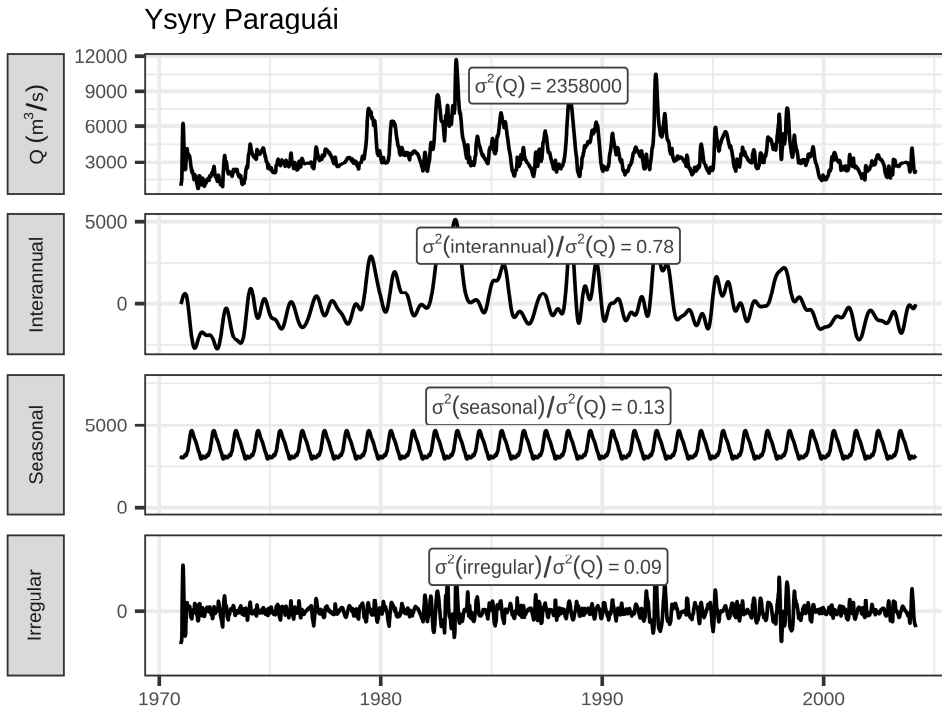

Figure S22: Decomposed time series for Ysry Paraguái (Paraguay River) at Asunción, Paraguay, (GRDC 3368100) an interannually variable river.

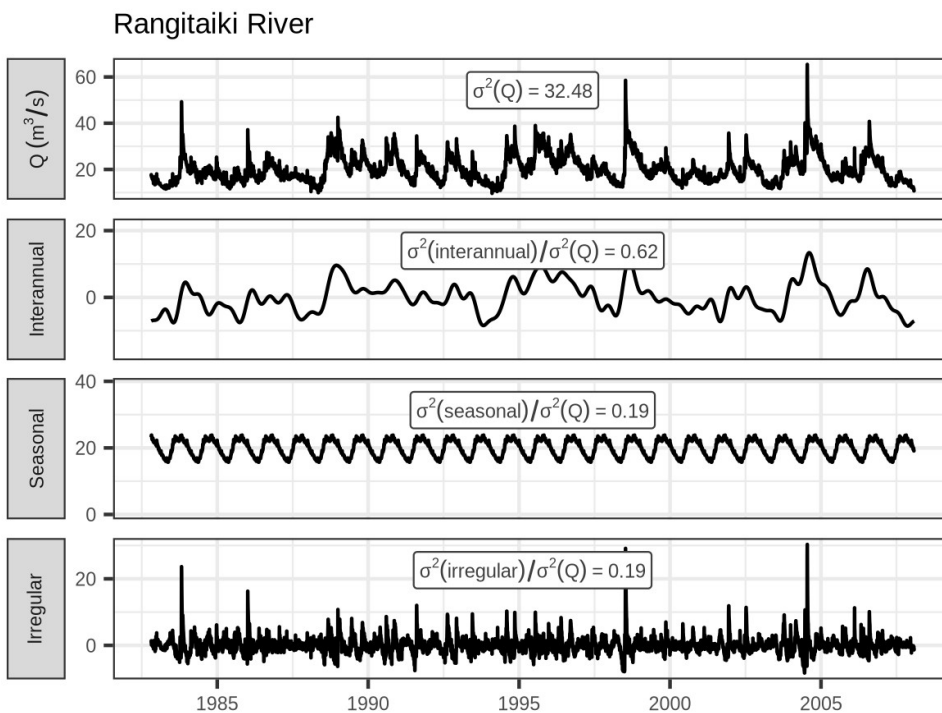

Figure S23: Decomposed time series for the Rangitaiki River at Murupara, Aotearoa (New Zealand), (GRDC 5863120) a river with 62% interannual variance.

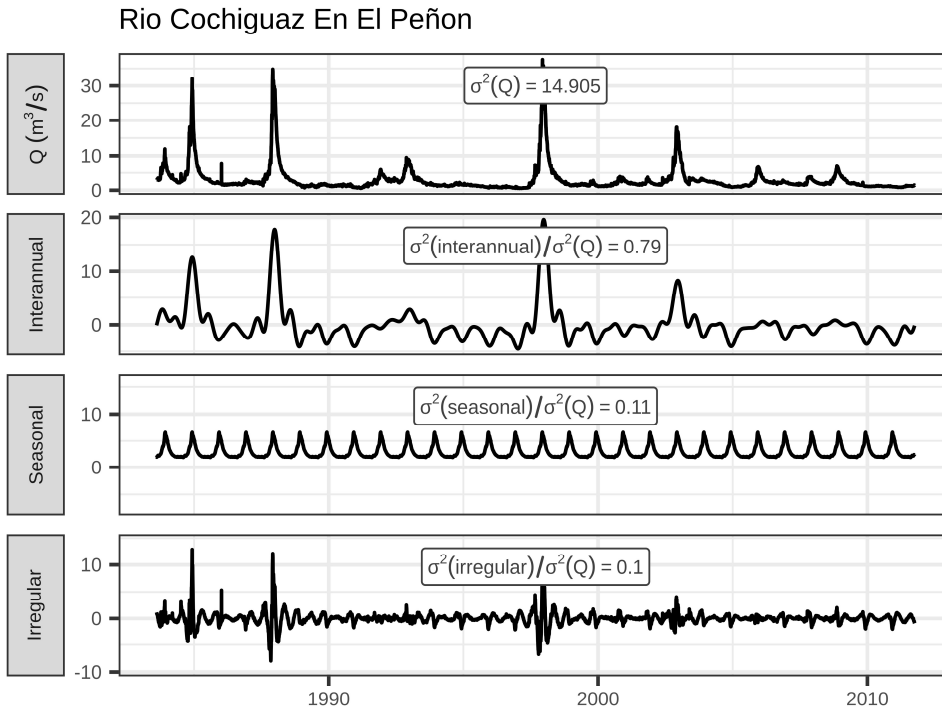

Figure S24: Decomposed time series for the Cochiguaz River (El Peñon, Chile), (Dirección General de Aguas 4313001) an interannually variable stream.

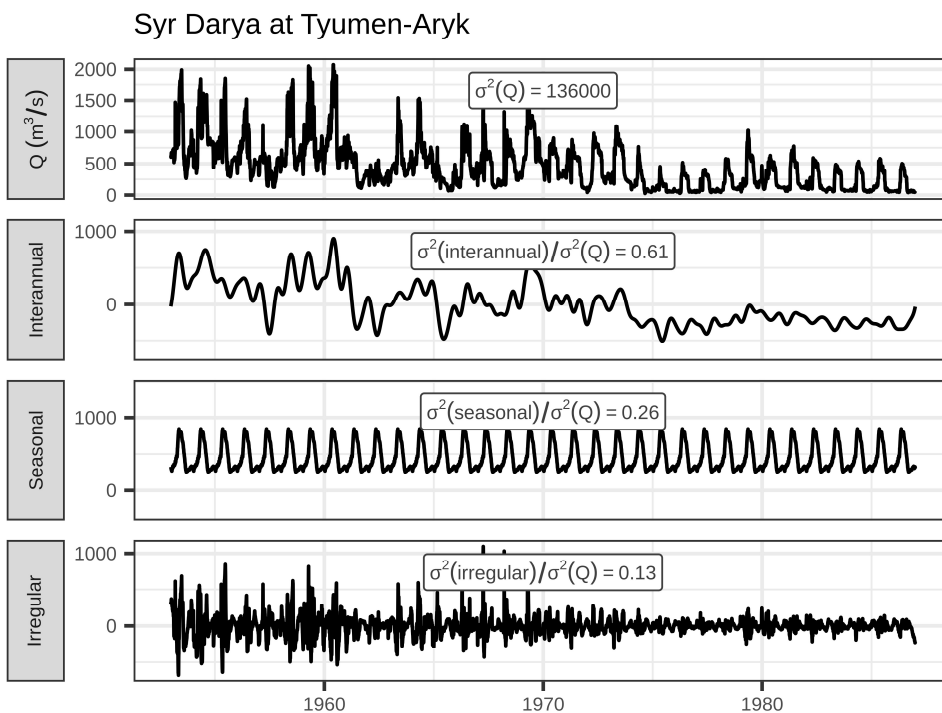

Figure S25: Decomposed time series for the Syr Darya (Tyumen-Aryk, Kazakhstan), (GRDC 2316200) an interannually variable stream, where interannual variability has been driven largely by water withdrawals for irrigation beginning in 1973 (Zou et al., 2019)

## S6.2: Examples of highly irregular streams

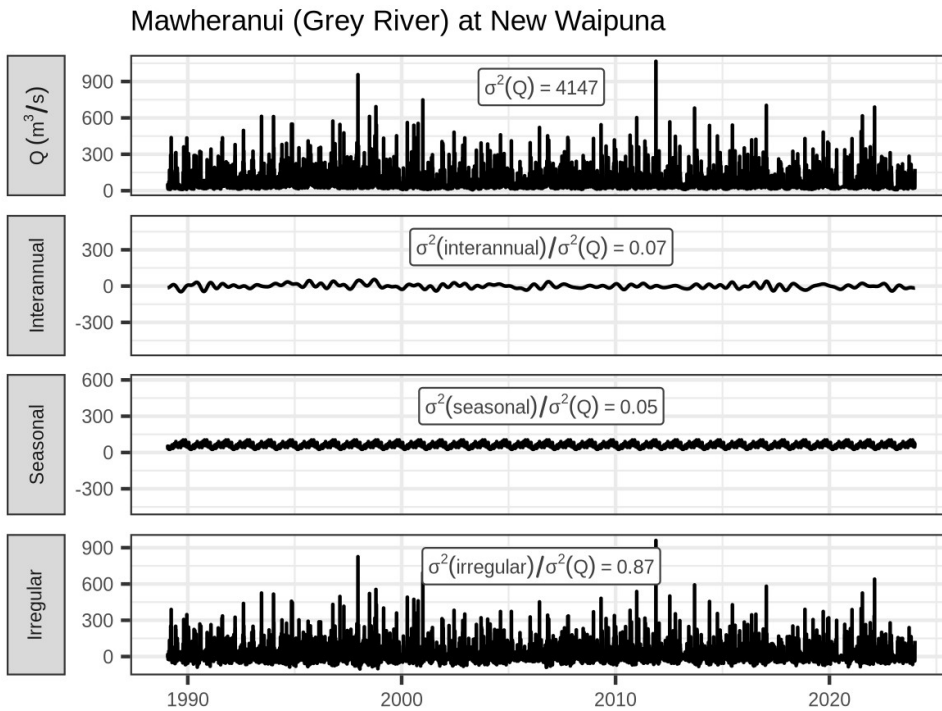

Figure S26: Decomposed time series for the Māwheranui River (New Zealand), (GRDC 5867710), a stream with highly irregular variance.

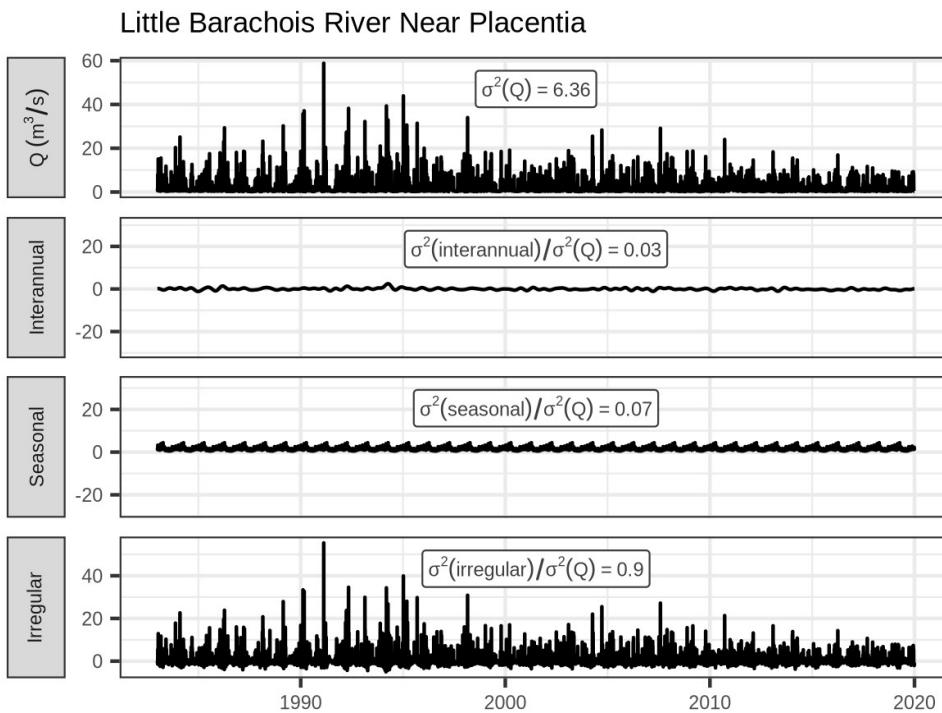

Figure S27: Decomposed time series for the Little Barachois River (Newfoundland, Canada), (Water Survey of Canada 02ZK003), a stream with highly irregular variance.

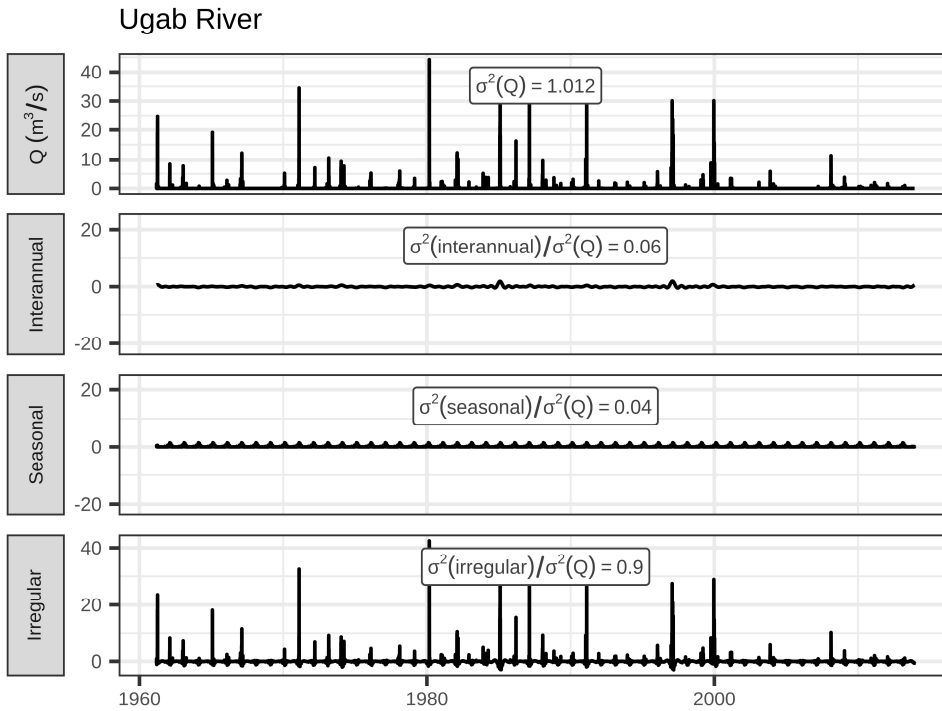

Figure S28: Decomposed time series for the Ugab River (Namibia), (GRDC 1258202), a stream with highly irregular variance.

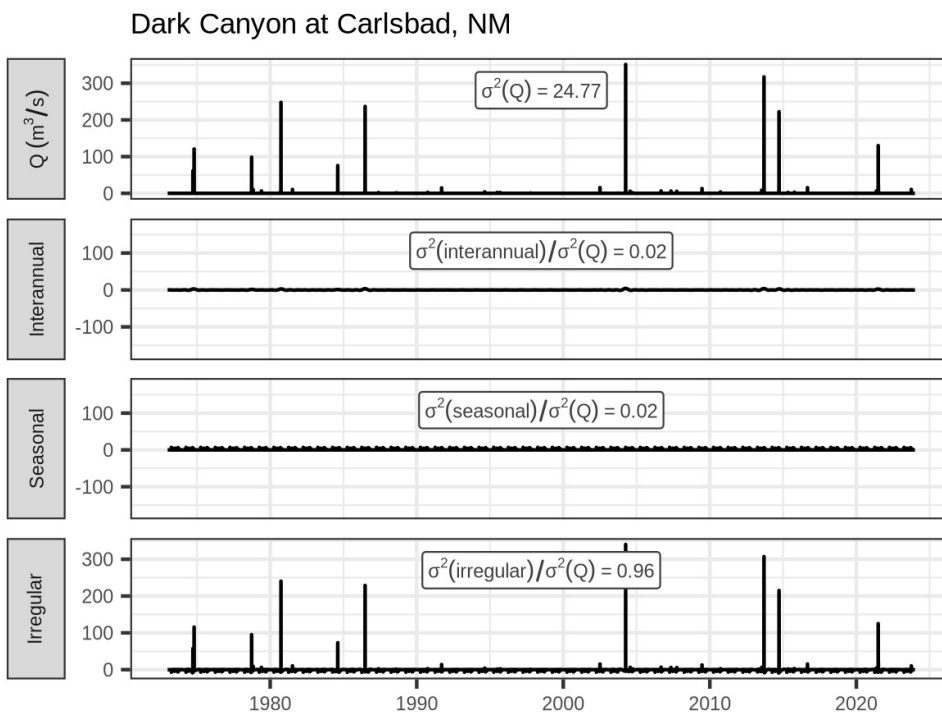

Figure S29: Decomposed time series for Dark Canyon at Carlsbad (New Mexico, United States), (USGS 08405150), a stream with highly irregular variance.

### Gieddejohka River, Norway

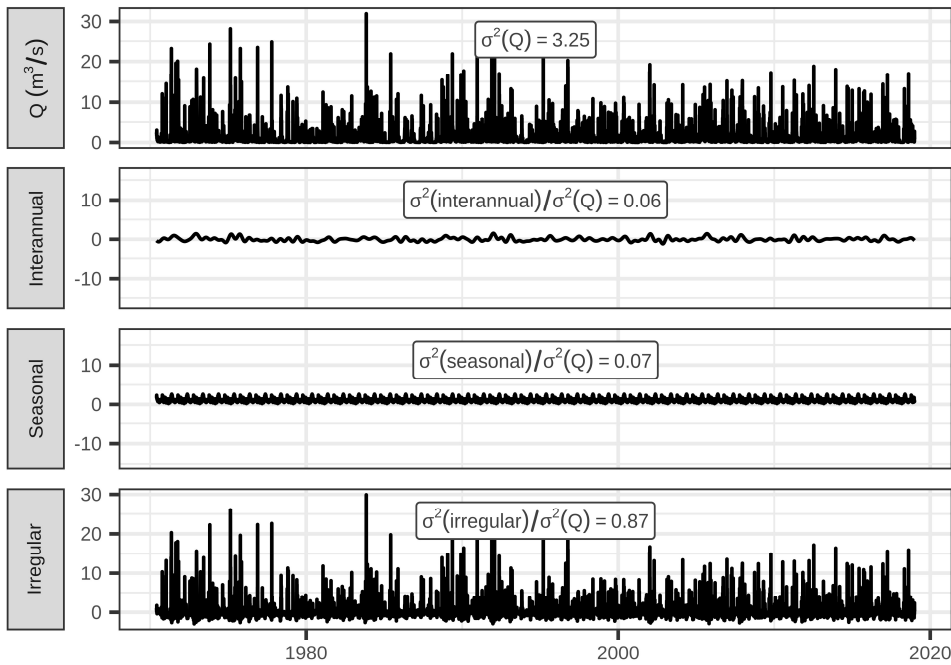

Figure S30: Decomposed time series for the Gieddejohka River (Leirpoldvatn, Norway), (GRDC 6731750), a stream with highly irregular variance.

### Haliya River

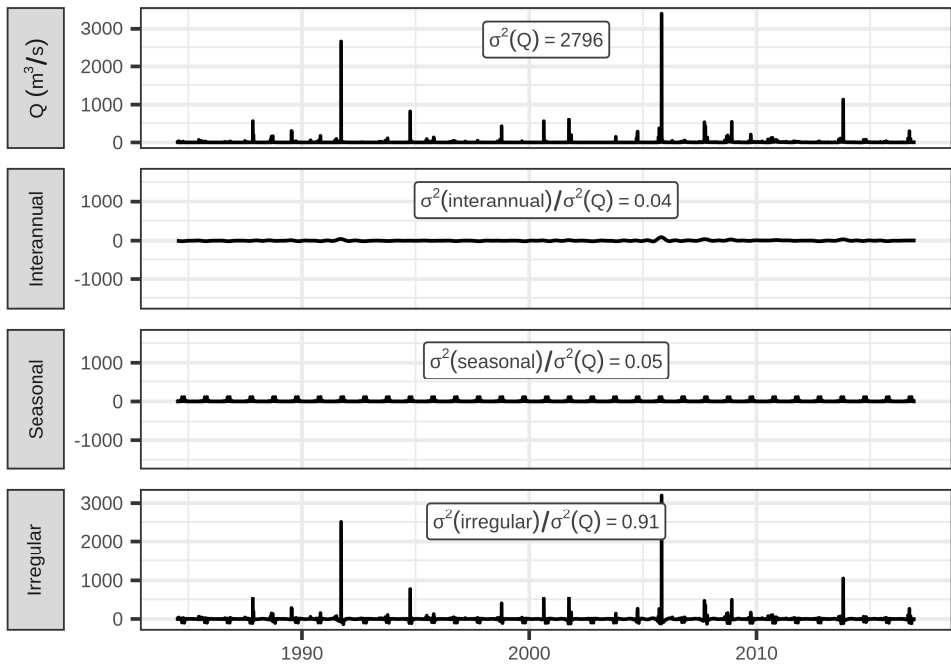

Figure S31: Decomposed time series for the Haliya River (Telangana, India), (Camels-IND 04012), a stream with highly irregular variance.

### S6.3: Examples of highly seasonal streams

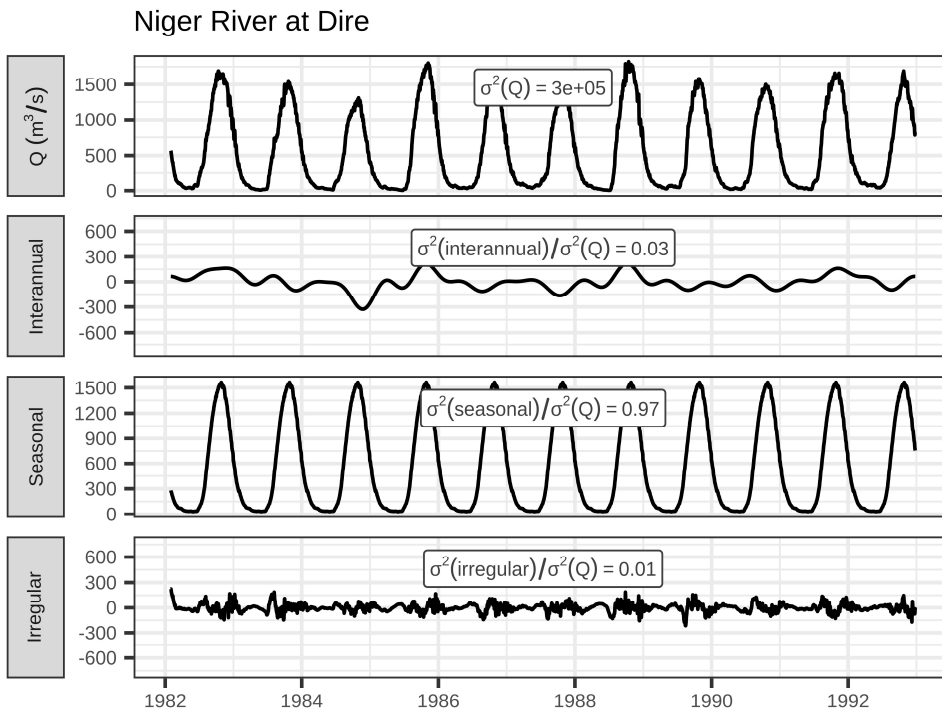

Figure S32: Decomposed time series for the Niger River at Dire (Mali), (GRDC 1134700), a highly seasonal river.

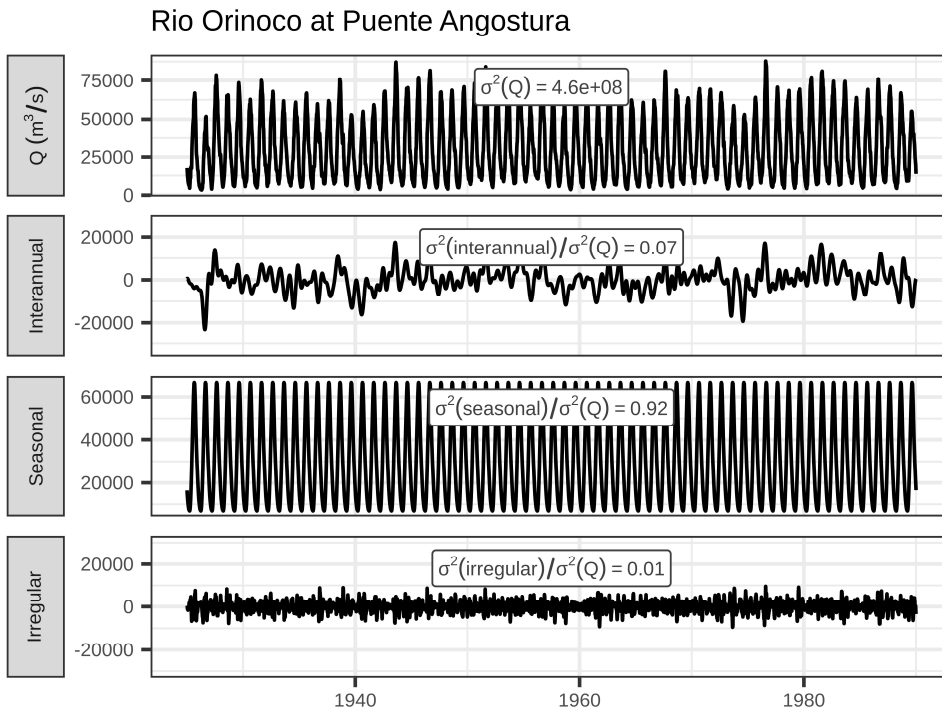

Figure S33: Decomposed time series for the Orinoco River at Puente Angostura (Venezuela), (GRDC 3206720), a highly seasonal river.

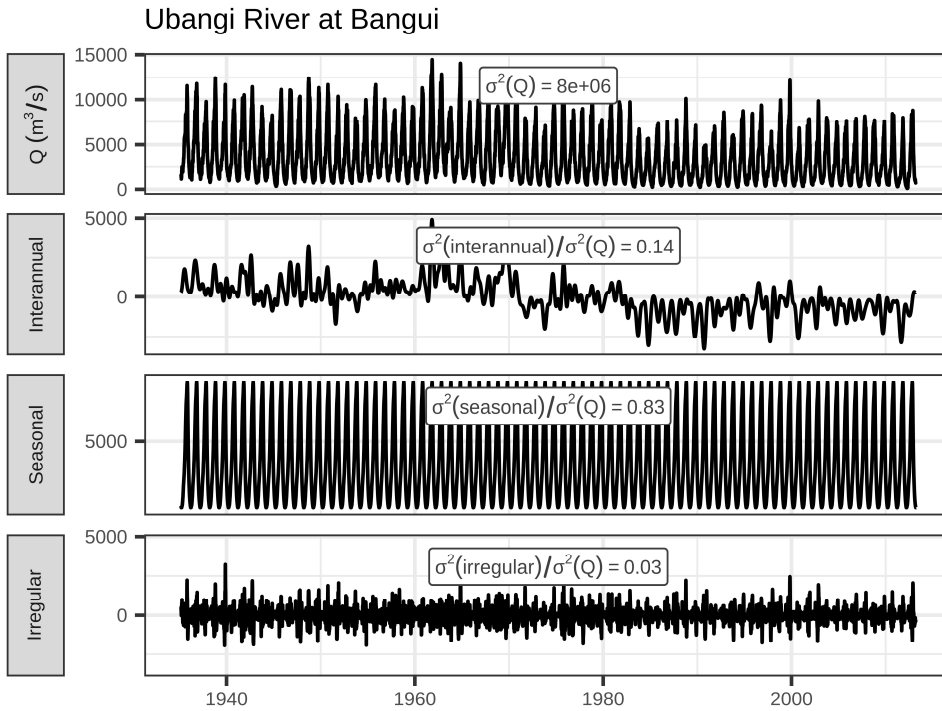

Figure S34: Decomposed time series for the Ubangi River at Bangui (Central African Republic), (GRDC 1749100), a highly seasonal river.

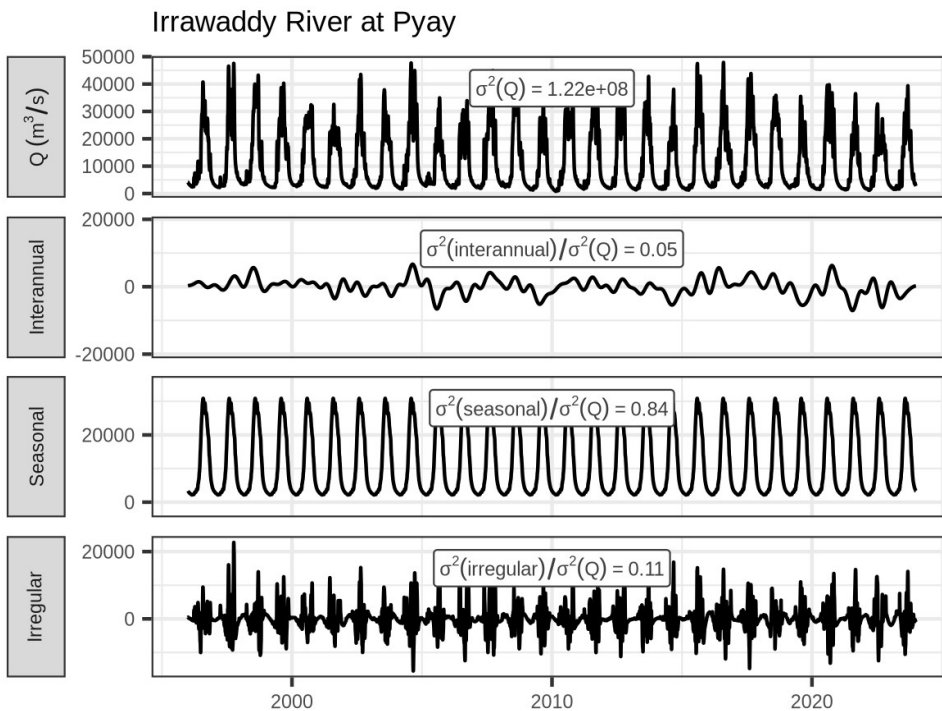

Figure S35: Decomposed time series for the Irrawaddy River at Pyay, Myanmar, (GRDC 2260700), a highly seasonal river.

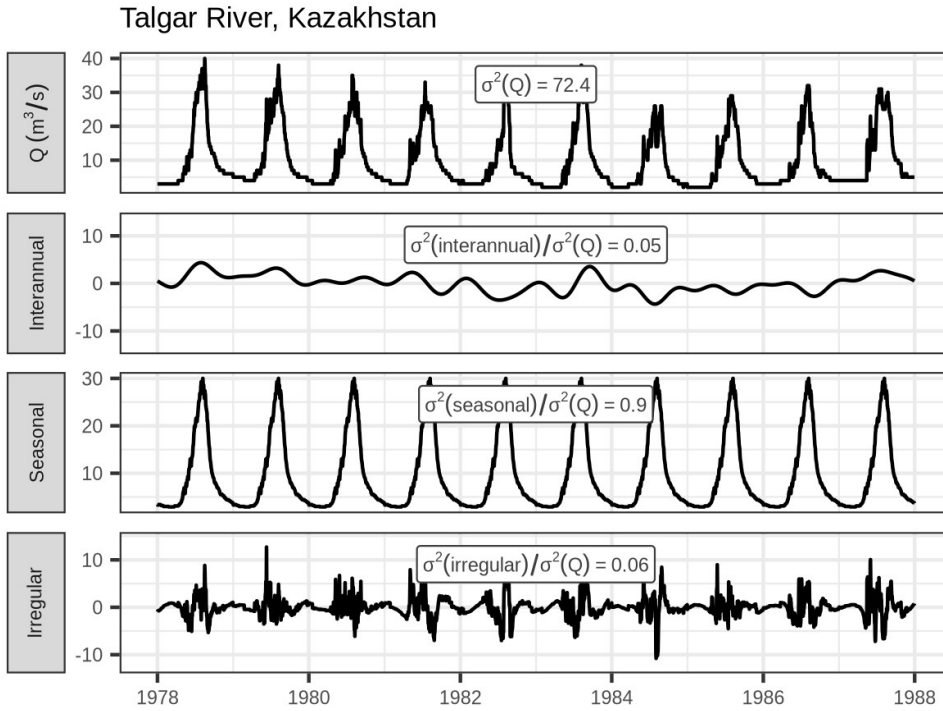

Figure S36: Decomposed time series for the Talgar River at Talgar (Kazakhstan), (GRDC 2314400), a highly seasonal river.

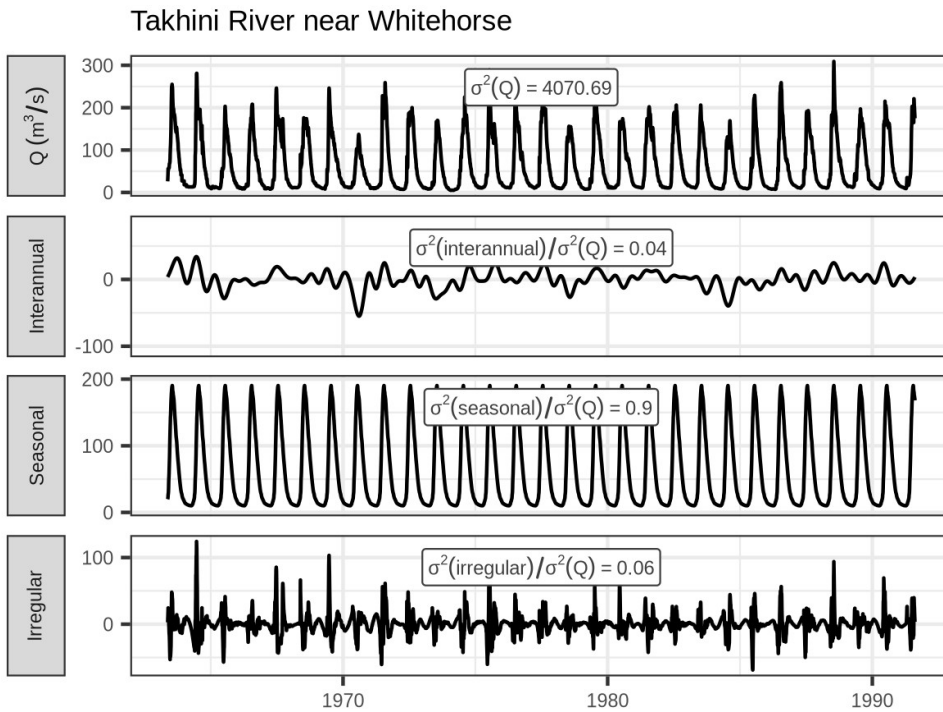

Figure S37: Decomposed time series for the Takhini River near Whitehorse (Yukon, Canada), (Water Survey of Canada 09AC001), a highly seasonal river.

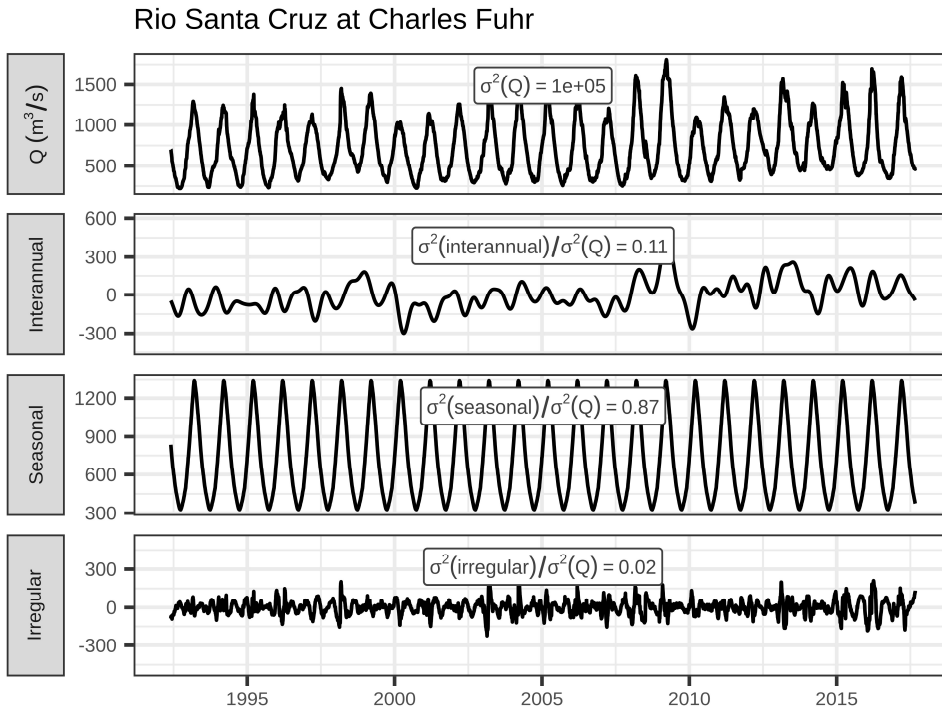

Figure S38: Decomposed time series for the Santa Cruz River at Charles Fuhr station (Santa Cruz, Argentina), (GRDC 3276800), a highly seasonal river.

## **S9: Climatological $NSE_{cb}$ based on differential split samples**

When hydrologic models are intended to be used for climate change projection, a popular technique is the differential split sample, where the dataset is split to maximize the difference in some climate variable between the training and testing periods (Klemeš, 1986). If the model achieves a high NSE when evaluated on a climate that is warmer, colder, wetter, or drier than it was trained on, then it is assumed to be good at extrapolating to a future climate.

We tested for split sample robustness using catchments in Brazil, Switzerland, and North America. For all catchments with at least 20 years of data, we split the years into warm/cold and wet/dry differential split samples. We used water years beginning October 1<sup>st</sup>, which is consistent with standard practices in each location (Almagro et al., 2021; Höge et al., 2023; What is a Water Year?, 2025).

To determine the warm/cold and wet/dry splits we used ERA5-Land data for Brazil and North America and gridded daily precipitation and temperature products from Meteo-Swiss for Switzerland (Höge et al., 2023). We evaluated the benchmark NSE when ‘trained’ on one half of each differential split sample and tested on the other half, and averaged the NSE across the two splits.

For comparison, we also randomly split the years into two equal sets, repeated the random split 10 times, and took the median benchmark NSE across the 10 splits.

Figure S34 shows the benchmark NSE for three sample splitting routines: random, a warm/cold differential split, and wet/dry differential split. These benchmark NSE values are shown for three datasets, covering Brazil, Switzerland, and North America. We find that in general, differential splitting of the sample reduces the benchmark NSE, as expected.

However, the reduction in benchmark NSE is smallest for the arctic, alpine, and tropical regions that have the highest benchmark NSEs to begin with. In other words, in these regions it is not necessary to accurately account for interannual climatic variability to achieve a ‘high’ NSE under a differential split sample. Since changes to temperature and precipitation in these regions over the next century may be much larger than historical climate variability, the NSE is unreliable judge of a model’s suitability for climate change projection.

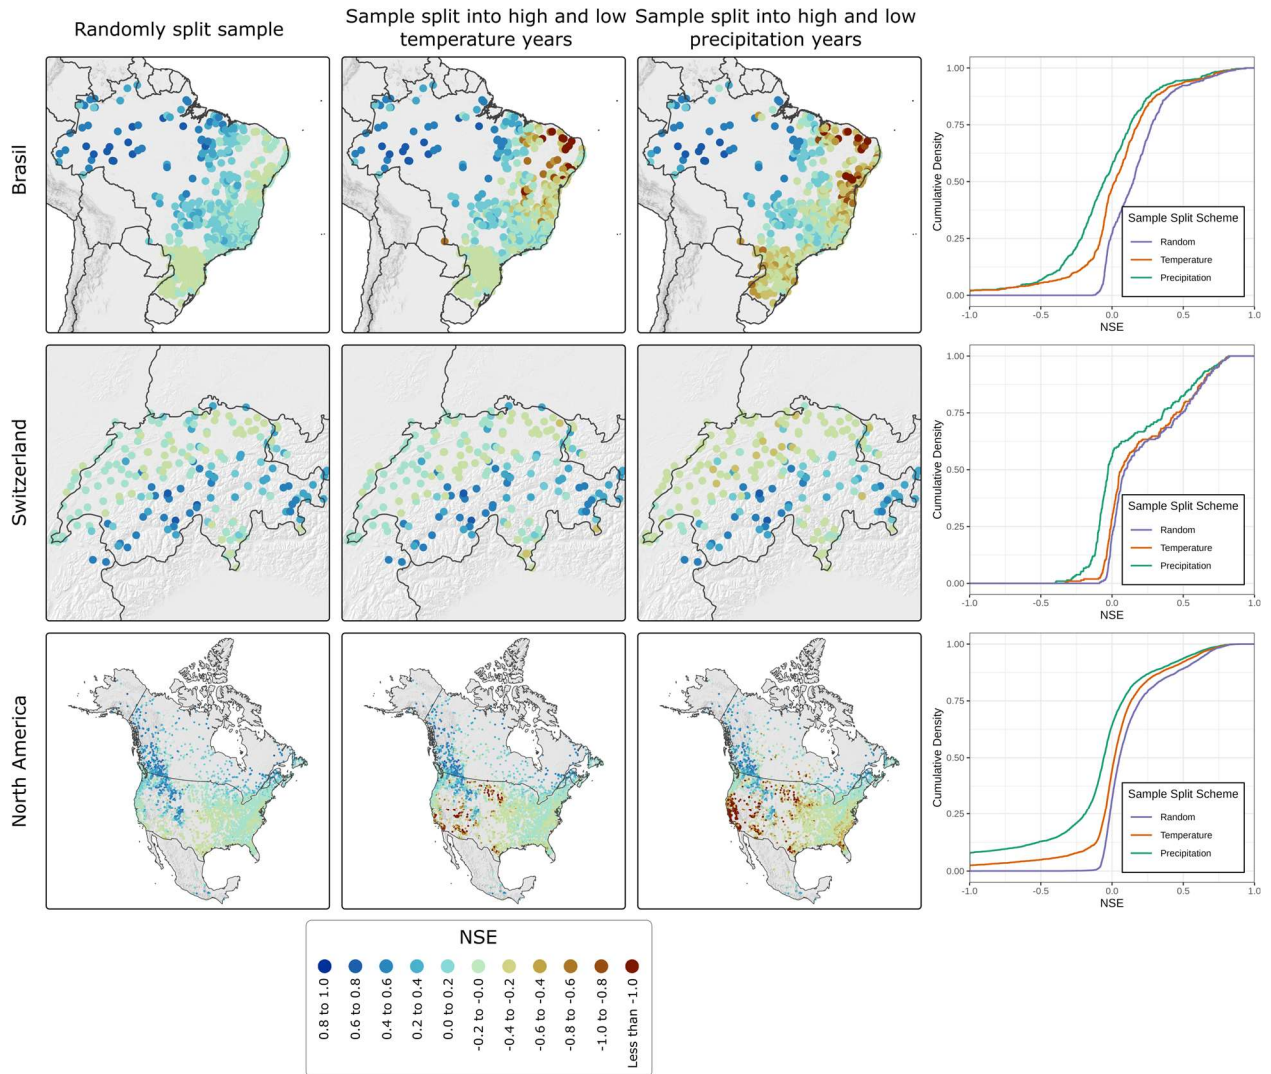

Figure S39: Splitting samples into warm/cold and wet/dry years reduces the performance of the climatological benchmark model, as expected. However, the reduction is smallest for the catchments that have the highest benchmark NSE under a random split.

## References

- Almagro, A., Oliveira, P. T. S., Meira Neto, A. A., Roy, T., and Troch, P.: CABra: a novel large-sample dataset for Brazilian catchments, *Hydrology and Earth System Sciences*, 25, 3105–3135, <https://doi.org/10.5194/hess-25-3105-2021>, 2021.
- Arsenault, R., Martel, J.-L., Brunet, F., Brissette, F., and Mai, J.: Continuous streamflow prediction in ungauged basins: long short-term memory neural networks clearly outperform traditional hydrological models, *Hydrology and Earth System Sciences*, 27, 139–157, <https://doi.org/10.5194/hess-27-139-2023>, 2023.
- Beck, H. E., Wood, E. F., Pan, M., Fisher, C. K., Miralles, D. G., Dijk, A. I. J. M. van, McVicar, T. R., and Adler, R. F.: MSWEP V2 Global 3-Hourly 0.1° Precipitation: Methodology and Quantitative Assessment, <https://doi.org/10.1175/BAMS-D-17-0138.1>, 2019.
- Chagas, V. B. P., Chaffe, P. L. B., Addor, N., Fan, F. M., Fleischmann, A. S., Paiva, R. C. D., and Siqueira, V. A.: CAMELS-BR: hydrometeorological time series and landscape attributes for 897 catchments in Brazil, *Earth System Science Data*, 12, 2075–2096, <https://doi.org/10.5194/essd-12-2075-2020>, 2020.
- Chagas, V. B. P., Chaffe, P. L. B., Addor, N., Fan, F. M., Fleischmann, A. S., Paiva, R. C. D., and Siqueira, V. A.: CAMELS-BR: Hydrometeorological time series and landscape attributes for 897 catchments in Brazil - link to files. (1.2), <https://doi.org/10.5281/zenodo.15025488>, 2025.
- Chen, M. and Xie, P.: CPC unified gauge-based analysis of global daily precipitation, Western Pacific Geophysics Meeting, Cairns, Australia, 2008.
- Cleveland, R. B., Cleveland, W. S., McRae, J. E., and Terpenning, I.: STL: A Seasonal-Trend Decomposition Procedure Based on Loess, *Journal of Official Statistics*, 6, 3–73, 1990.
- Cooley, J. W. and Tukey, J. W.: An algorithm for the machine calculation of complex Fourier series, *Math. Comp.*, 19, 297–301, <https://doi.org/10.1090/S0025-5718-1965-0178586-1>, 1965.
- Falcone, J. A.: GAGES-II: Geospatial Attributes of Gages for Evaluating Streamflow, U.S. Geological Survey, <https://doi.org/10.3133/70046617>, 2011.
- Fick, S. E. and Hijmans, R. J.: WorldClim 2: new 1-km spatial resolution climate surfaces for global land areas, *International Journal of Climatology*, 37, 4302–4315, <https://doi.org/10.1002/joc.5086>, 2017.
- Funk, C., Peterson, P., Landsfeld, M., Pedreros, D., Verdin, J., Shukla, S., Husak, G., Rowland, J., Harrison, L., Hoell, A., and Michaelsen, J.: The climate hazards infrared precipitation with stations—a new environmental record for monitoring extremes, *Sci Data*, 2, 150066, <https://doi.org/10.1038/sdata.2015.66>, 2015.

Han, J., Liu, Z., Woods, R., McVicar, T. R., Yang, D., Wang, T., Hou, Y., Guo, Y., Li, C., and Yang, Y.: Streamflow seasonality in a snow-dwindling world, *Nature*, 629, 1075–1081, <https://doi.org/10.1038/s41586-024-07299-y>, 2024.

Höge, M., Kauzlaric, M., Siber, R., Schönenberger, U., Horton, P., Schwanbeck, J., Floriancic, M. G., Viviroli, D., Wilhelm, S., Sikorska-Senoner, A. E., Addor, N., Brunner, M., Pool, S., Zappa, M., and Fenicia, F.: CAMELS-CH: hydro-meteorological time series and landscape attributes for 331 catchments in hydrologic Switzerland, *Earth System Science Data*, 15, 5755–5784, <https://doi.org/10.5194/essd-15-5755-2023>, 2023.

Kendall, M. and Stuart, A.: Time Series: Trend and Seasonality, in: *The Advanced Theory of Statistics*, vol. 3, Griffin, London, 366–402, 1966.

Klemeš, V.: Operational testing of hydrological simulation models, *Hydrological Sciences Journal*, 31, 13–24, <https://doi.org/10.1080/02626668609491024>, 1986.

Klingler, C., Schulz, K., and Herrnegger, M.: LamaH-CE: LARge-SaMple DAta for Hydrology and Environmental Sciences for Central Europe, *Earth System Science Data*, 13, 4529–4565, <https://doi.org/10.5194/essd-13-4529-2021>, 2021.

Klotz, D., Gauch, M., Kratzert, F., Nearing, G., and Zscheischler, J.: Technical Note: The divide and measure nonconformity – how metrics can mislead when we evaluate on different data partitions, *Hydrology and Earth System Sciences*, 28, 3665–3673, <https://doi.org/10.5194/hess-28-3665-2024>, 2024.

Knoben, W. J. M., Woods, R. A., and Freer, J. E.: A Quantitative Hydrological Climate Classification Evaluated With Independent Streamflow Data, *Water Resources Research*, 54, 5088–5109, <https://doi.org/10.1029/2018WR022913>, 2018.

Kraft, B., Schirmer, M., Aeberhard, W. H., Zappa, M., Seneviratne, S. I., and Gudmundsson, L.: CH-RUN: a deep-learning-based spatially contiguous runoff reconstruction for Switzerland, *Hydrology and Earth System Sciences*, 29, 1061–1082, <https://doi.org/10.5194/hess-29-1061-2025>, 2025.

Kratzert, F.: CAMELS benchmark models, <https://doi.org/10.4211/hs.474ecc37e7db45baa425cdb4fc1b61e1>, 2019.

Kratzert, F., Gauch, M., Nearing, G., and Klotz, D.: NeuralHydrology --- A Python library for Deep Learning research in hydrology, *Journal of Open Source Software*, 7, 4050, <https://doi.org/10.21105/joss.04050>, 2022.

Kratzert, F., Gauch, M., Klotz, D., and Nearing, G.: HESS Opinions: Never train a Long Short-Term Memory (LSTM) network on a single basin, *Hydrology and Earth System Sciences*, 28, 4187–4201, <https://doi.org/10.5194/hess-28-4187-2024>, 2024.

Mizukami, N., Rakovec, O., Newman, A. J., Clark, M. P., Wood, A. W., Gupta, H. V., and Kumar, R.: On the choice of calibration metrics for “high-flow” estimation using hydrologic models, *Hydrology and Earth System Sciences*, 23, 2601–2614, <https://doi.org/10.5194/hess-23-2601-2019>, 2019.

Muñoz Sabater, J.: ERA5-Land monthly averaged data from 1950 to present, <https://doi.org/10.24381/cds.68d2bb30>, 2019.

Nearing, G., Cohen, D., Dube, V., Gauch, M., Gilon, O., Harrigan, S., Hassidim, A., Klotz, D., Kratzert, F., Metzger, A., Nevo, S., Pappenberger, F., Prudhomme, C., Shalev, G., Shenzi, S., Tekalign, T. Y., Weitzner, D., and Matias, Y.: Global prediction of extreme floods in ungauged watersheds, *Nature*, 627, 559–563, <https://doi.org/10.1038/s41586-024-07145-1>, 2024.

Newman, A. J., Clark, M. P., Sampson, K., Wood, A., Hay, L. E., Bock, A., Viger, R. J., Blodgett, D., Brekke, L., Arnold, J. R., Hopson, T., and Duan, Q.: Development of a large-sample watershed-scale hydrometeorological data set for the contiguous USA: data set characteristics and assessment of regional variability in hydrologic model performance, *Hydrology and Earth System Sciences*, 19, 209–223, <https://doi.org/10.5194/hess-19-209-2015>, 2015.

Newman, A. J., Mizukami, N., Clark, M. P., Wood, A. W., Nijssen, B., and Nearing, G.: Benchmarking of a Physically Based Hydrologic Model, <https://doi.org/10.1175/JHM-D-16-0284.1>, 2017.

CPC Global Unified Temperature:  
<https://psl.noaa.gov/data/gridded/data.cpc.globaltemp.html>, last access: 27 May 2025.

Pellerin, J. and Nzokou Tanekou, F.: Reference Hydrometric Basin Network Update, Environment and Climate Change Canada, Gatineau, QC, 2020.

R Core team: R: A Language and Environment for Statistical Computing, 2025.

Regan, R. S., Juracek, K. E., Hay, L. E., Markstrom, S. L., Viger, R. J., Driscoll, J. M., LaFontaine, J. H., and Norton, P. A.: The U. S. Geological Survey National Hydrologic Model infrastructure: Rationale, description, and application of a watershed-scale model for the conterminous United States, *Environmental Modelling & Software*, 111, 192–203, <https://doi.org/10.1016/j.envsoft.2018.09.023>, 2019.

Schnorbus, M.: VIC Glacier (VIC-GL) - Description of VIC model changes and upgrades, VIC Generation 2 Deployment Report volume 1, Pacific Climate Impacts Consortium, University of Victoria, Victoria, BC, 2018.

Schnorbus, M.: VIC-Glacier (VIC-GL): Model set-up and deployment for the Peace, Fraser, and Columbia: VIC generation 2 deployment report, volume 6, Pacific Climate Impacts Consortium (PCIC), 2020.

Seibert, J., Vis, M. J. P., Lewis, E., and van Meerveld, H. j.: Upper and lower benchmarks in hydrological modelling, *Hydrological Processes*, 32, 1120–1125, <https://doi.org/10.1002/hyp.11476>, 2018.

Siqueira, V. A., Paiva, R. C. D., Fleischmann, A. S., Fan, F. M., Ruhoff, A. L., Pontes, P. R. M., Paris, A., Calmant, S., and Collischonn, W.: Toward continental hydrologic–hydrodynamic modeling in South America, *Hydrology and Earth System Sciences*, 22, 4815–4842, <https://doi.org/10.5194/hess-22-4815-2018>, 2018.

Song, Y., Bindas, T., Shen, C., Ji, H., Knoben, W. J. M., Lonzarich, L., Clark, M. P., Liu, J., van Werkhoven, K., Lamont, S., Denno, M., Pan, M., Yang, Y., Rapp, J., Kumar, M., Rahmani, F., Thébault, C., Adkins, R., Halgren, J., Patel, T., Patel, A., Sawadekar, K. A., and Lawson, K.: High-Resolution National-Scale Water Modeling Is Enhanced by Multiscale Differentiable Physics-Informed Machine Learning, *Water Resources Research*, 61, e2024WR038928, <https://doi.org/10.1029/2024WR038928>, 2025.

What is a Water Year? [https://water.usgs.gov/nwc/explain\\_data.html](https://water.usgs.gov/nwc/explain_data.html), last access: 17 April 2025.

Yang, Y., Feng, D., Beck, H. E., Hu, W., Abbas, A., Sengupta, A., Delle Monache, L., Hartman, R., Lin, P., Shen, C., and Pan, M.: Global Daily Discharge Estimation Based on Grid Long Short-Term Memory (LSTM) Model and River Routing, *Water Resources Research*, 61, e2024WR039764, <https://doi.org/10.1029/2024WR039764>, 2025.

Zomer, R. J., Xu, J., and Trabucco, A.: Version 3 of the Global Aridity Index and Potential Evapotranspiration Database, *Sci Data*, 9, 409, <https://doi.org/10.1038/s41597-022-01493-1>, 2022.

Zou, S., Jilili, A., Duan, W., Maeyer, P. D., and de Voorde, T. V.: Human and Natural Impacts on the Water Resources in the Syr Darya River Basin, Central Asia, *Sustainability*, 11, 3084, <https://doi.org/10.3390/su11113084>, 2019.
